# Supplementary material for: Synthesis and Bioactivity of Luffarin I
Source: MDPI journal article supplement (doi:10.3390/md13042407), 2015-04-20
Supplement: s1 [file s1]

## Supplementary Information

As it has shown in the manuscript treatment of **26** with (*S*)-2-methyl-CBS-oxazaborolidine using borane dimethylsulfide as reducing agent under inert atmosphere and low temperature, produced diastereoselectively **27** and **28**.

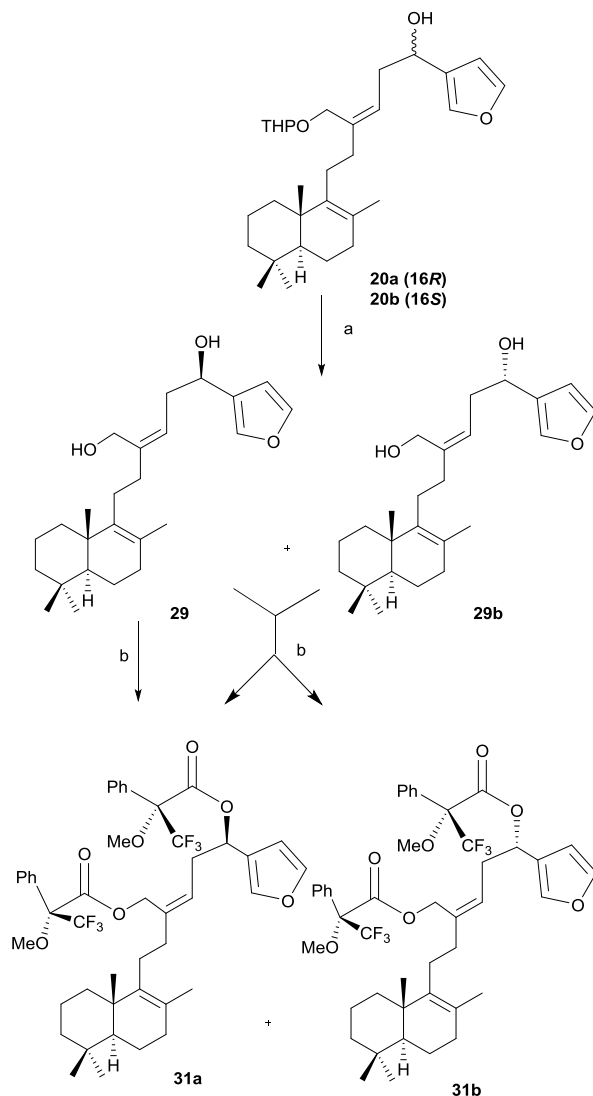

**Scheme S1.** Synthesis of **31a/31b**. Reagents and conditions: (a) *p*-TsOH, MeOH, RT, 66%; (b) (+)-MTPA, DMAP, DCC, DCM, 0 °C-RT, 24 h, 45%.

The generated stereogenic center at C-16 has *R* configuration as expected. Confirmation of the diastereoselectivity of the reduction was done applying Mosher methodology (Scheme S1). The mixture of diastereoisomers **29/29b**, obtained after deprotection of mixture **20a/20b**, was esterified with (+)-MTPA leading to the diester mixture **31a/31b** (Scheme S1).

Comparison between the <sup>1</sup>H NMR spectra of the mixture (**29/29b**) and compound **29** obtained from Corey-Bakshi-Shibata reduction indicated that this reaction afforded only one of the diastereoisomers.

Isobe *et al.* [1] have established that for secondary alcohols with an  $\alpha$ -furyl substituent, the ring protons (H-18 in this case) can be used for the analysis that allow determination of the absolute configuration of the centre observed.

Tables S1 and S2 show the chemical shifts for H-18 for **29** and **31a** as well as for **29b** and **31b**.

**Tables S1.** Comparative studies for the signals of H-18 in  $^1\text{H-NMR}$  for compounds **29** and **31a**.
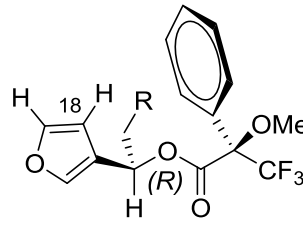

The chemical structure shows a furan ring with a hydrogen atom at position 18. It is substituted with an R group and a hydrogen atom. The furan ring is connected to a chiral center (C-16) which is part of an ester linkage. This chiral center is also bonded to a hydrogen atom and a trifluoromethyl group (CF<sub>3</sub>). The ester oxygen is further substituted with a methoxy group (OMe) and a phenyl ring.

|                     | <b>29</b> | <b>31a</b> |
|---------------------|-----------|------------|
| $\delta$ H-18 (ppm) | 6.41      | 6.40       |

**Table S2.** Comparative studies for the signals of H-18 in  $^1\text{H-NMR}$  for compounds **29b** and **31b**.
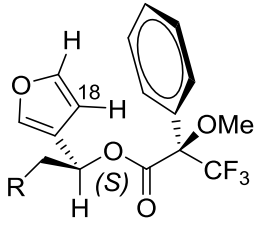

The chemical structure shows a furan ring with a hydrogen atom at position 18. It is substituted with a hydrogen atom and an R group. The furan ring is connected to a chiral center (C-16) which is part of an ester linkage. This chiral center is also bonded to a hydrogen atom and a trifluoromethyl group (CF<sub>3</sub>). The ester oxygen is further substituted with a methoxy group (OMe) and a phenyl ring.

|                     | <b>29b</b> | <b>31b</b> |
|---------------------|------------|------------|
| $\delta$ H-18 (ppm) | 6.41       | 6.28       |

The comparison between the chemical shifts of H-18 in **31a** ( $\delta$  6.40) and **31b** ( $\delta$  6.26) permit us to conclude that the isomer with the signal in the  $^1\text{H NMR}$  spectrum of H-18, at lower field (**31a**) is 16*R* and the one at higher field (**31b**) is 16*S*, due to the shielding effect of the aromatic ring. This analysis confirmed the diastereoselectivity of the reduction of **26** that lead to compounds **27** and **28** [1].

19,20-Epoxy-luffara-8,13*Z*,17(20),18-tetraen-16(*R,S*),21-diol (**29/29b**): To a solution of **20a/20b** (14 mg, 0.03 mmol) in MeOH (3.5 mL) was added *p*-toluenesulfonic acid (1 mg, 0.005 mmol). The reaction mixture was stirred for 48 h. Then, water was added and it was extracted with AcOEt. The combined organic layers were washed with water and brine, dried ( $\text{Na}_2\text{SO}_4$ ), filtered, and concentrated in vacuo to obtain **29/29b** (7 mg, 66%). IR  $\nu$  3345 (OH), 2928, 2866, 1456, 1161, 1024;  $^1\text{H-NMR}$  (400 MHz,  $\text{CDCl}_3$ )  $\delta$  7.40 (2H, s, H-19, H-20), 6.41 (1H, s, H-18), 5.41 (1H, t,  $J = 7.9$  Hz, H-14), 4.73 (1H, dd,  $J = 4.4$  and 8.0 Hz, H-16), 4.20 (1H, d,  $J = 11.6$  Hz, H<sub>A</sub>-21), 4.05 (1H, d,  $J = 11.6$  Hz, H<sub>B</sub>-21), 2.60–2.50 (2H, m, H-15), 2.20–2.10 (4H, m, H-11, H-12), 2.00–1.00 (11H, m), 1.58 (3H, s, Me-22), 0.95 (3H, s, Me-23), 0.88 (3H, s, Me-25), 0.83 (3H, s, Me-24);  $^{13}\text{C-NMR}$  (100 MHz,  $\text{CDCl}_3$ )  $\delta$  144.0 (C), 143.3 (CH), 140.1 (C), 138.9 (CH), 128.7 (C), 126.1 (C), 123.0 (CH), 108.5 (CH), 66.0 (CH), 60.2 (CH<sub>2</sub>), 51.9 (CH), 41.8 (CH<sub>2</sub>), 39.0 (C), 37.1 (CH<sub>2</sub>), 37.0 (CH<sub>2</sub>), 36.3 (CH<sub>2</sub>), 33.6 (CH<sub>2</sub>), 33.3 (C, CH<sub>3</sub>), 27.4 (CH<sub>2</sub>), 21.7 (CH<sub>3</sub>), 20.1 (CH<sub>3</sub>), 19.5 (CH<sub>3</sub>), 19.0 (CH<sub>2</sub>  $\times$  2); HRMS (ESI)  $m/z$  calcd for  $\text{C}_{25}\text{H}_{38}\text{O}_3\text{Na}$  ( $\text{M} + \text{Na}$ )<sup>+</sup> 409.2713, found 409.2695.

Di-(*R*- $\alpha$ -methoxy- $\alpha$ -trifluoromethyl-phenyl)-acetate of 19,20-epoxy-luffara-8,13*Z*,17(20),18-tetraen-16(*R,S*),21-diol (**31a/31b**): To a solution of **29/29b** (7 mg, 0.017 mmol) in DCM (0.6 mL), *R*- $\alpha$ -methoxy- $\alpha$ -trifluoromethylphenylacetic acid (9 mg, 0.04 mmol) and DMAP (1 mg, 0.006 mmol)

were added. It was cooled to 0 °C and under argon atmosphere, *N,N*-dicyclohexylcarbodiimide (DCC) (38 µL, 0.38 mmol) was added. The mixture was reacted at 0 °C for 90 min, and then, it was allowed to warm to room temperature. The reaction mixture was stirred for 24 h. The resulting crude was filtered and water was added. Then it was extracted with AcOEt and the combined organic layers were washed with 2 M aqueous solution of HCl, 10% aqueous solution of NaHCO<sub>3</sub> and water until neutral pH was reached, dried (Na<sub>2</sub>SO<sub>4</sub>), filtered, and concentrated in vacuo to obtain **31a/31b** (6 mg, 45%).  $[\alpha]_{\text{D}}^{20} = +28.7$  (*c* 0.39, CHCl<sub>3</sub>); IR  $\nu$  2932, 2859, 1748 (C=O), 1668 (C=C), 1456, 1271, 1169, 1022; <sup>1</sup>H-NMR (400 MHz, CDCl<sub>3</sub>)  $\delta$  7.45–7.30 (12H, m, H-19, H-20, Ph-), 6.39 (1H, s, H-18, 16R, minor.), 6.27 (1H, s, H-18, 16S, major.), 5.98 (1H, t, *J* = 5.8 Hz, H-16 major.), 5.97 (1H, t, *J* = 5.8 Hz, H-16 minor.), 5.46 (1H, t, *J* = 7.2 Hz, H-14, major.), 5.37 (1H, t, *J* = 7.8 Hz, H-14, minor.), 4.83 (1H, d, *J* = 12.0 Hz, H<sub>A</sub>-21, major.), 4.78 (1H, d, *J* = 12.0 Hz, H<sub>A</sub>-21, minor.), 4.70 (1H, d, *J* = 12.0 Hz, H<sub>B</sub>-21, major.), 4.63 (1H, d, *J* = 12.0 Hz, H<sub>B</sub>-21, minor.), 3.51 (3H, s, MeO), 3.50 (6H, s, MeO), 3.45 (3H, s, MeO), 2.85–2.60 (2H, m, H-15), 2.20–2.00 (4H, m, H-11, H-12), 2.00–1.00 (11H, m), 1.54 (3H, s, Me-22), 0.94 (3H, s, Me-23), 0.88 (3H, s, Me-25), 0.82 (3H, s, Me-24); HRMS (ESI) *m/z* calcd for C<sub>45</sub>H<sub>56</sub>NO<sub>7</sub>F<sub>6</sub> (M + NH<sub>4</sub>) 836.3956, found 836.3985.

Di-(*R*- $\alpha$ -methoxy- $\alpha$ -trifluoromethyl-phenyl)-acetate of 19,20-epoxy-luffara-8,13Z,17(20), 18-tetraen-16R,21-diol (**31a**): To a solution of **29** (5 mg, 0.013 mmol) in DCM (0.45 mL), *R*- $\alpha$ -methoxy- $\alpha$ -trifluoromethylphenylacetic acid (7 mg, 0.03 mmol) and DMAP (1 mg, 0.005 mmol) were added. It was cooled to 0 °C and under argon atmosphere, DCC (28 µL, 0.28 mmol) was added. The mixture was reacted at 0 °C for 90 min, and then, it was allowed to warm to room temperature. The reaction mixture was stirred for 24 h. The resulting crude was filtered and water was added. Then it was extracted with AcOEt and the combined organic layers were washed with 2 M aqueous solution of HCl, 10% aqueous solution of NaHCO<sub>3</sub> and water until neutral pH was reached, dried (Na<sub>2</sub>SO<sub>4</sub>), filtered, and concentrated in vacuo to obtain **31a** (9 mg, 80%).  $[\alpha]_{\text{D}}^{20} = +12.3$  (*c* 0.36, CHCl<sub>3</sub>); IR  $\nu$  3065, 2926, 2855, 1748 (C=O), 1670 (C=C), 1464, 1271, 1169, 1022; <sup>1</sup>H-NMR (400 MHz, CDCl<sub>3</sub>)  $\delta$  7.45–7.30 (12H, m, H-19, H-20, Ph-), 6.39 (1H, s, H-18), 5.97 (1H, t, *J* = 5.8 Hz, H-16), 5.37 (1H, t, *J* = 7.8 Hz, H-14), 4.78 (1H, d, *J* = 12.0 Hz, H<sub>A</sub>-21), 4.63 (1H, d, *J* = 12.0 Hz, H<sub>B</sub>-21), 3.50 (3H, s, MeO), 3.45 (3H, s, MeO), 2.85–2.60 (2H, m, H-15), 2.20–2.00 (4H, m, H-11, H-12), 2.00–1.00 (11H, m), 1.54 (3H, s, Me-22), 0.94 (3H, s, Me-23), 0.88 (3H, s, Me-25), 0.82 (3H, s, Me-24); HRMS (ESI) *m/z* calcd for C<sub>45</sub>H<sub>56</sub>NO<sub>7</sub>F<sub>6</sub> (M+NH<sub>4</sub>) 836.3956, found 836.3985.

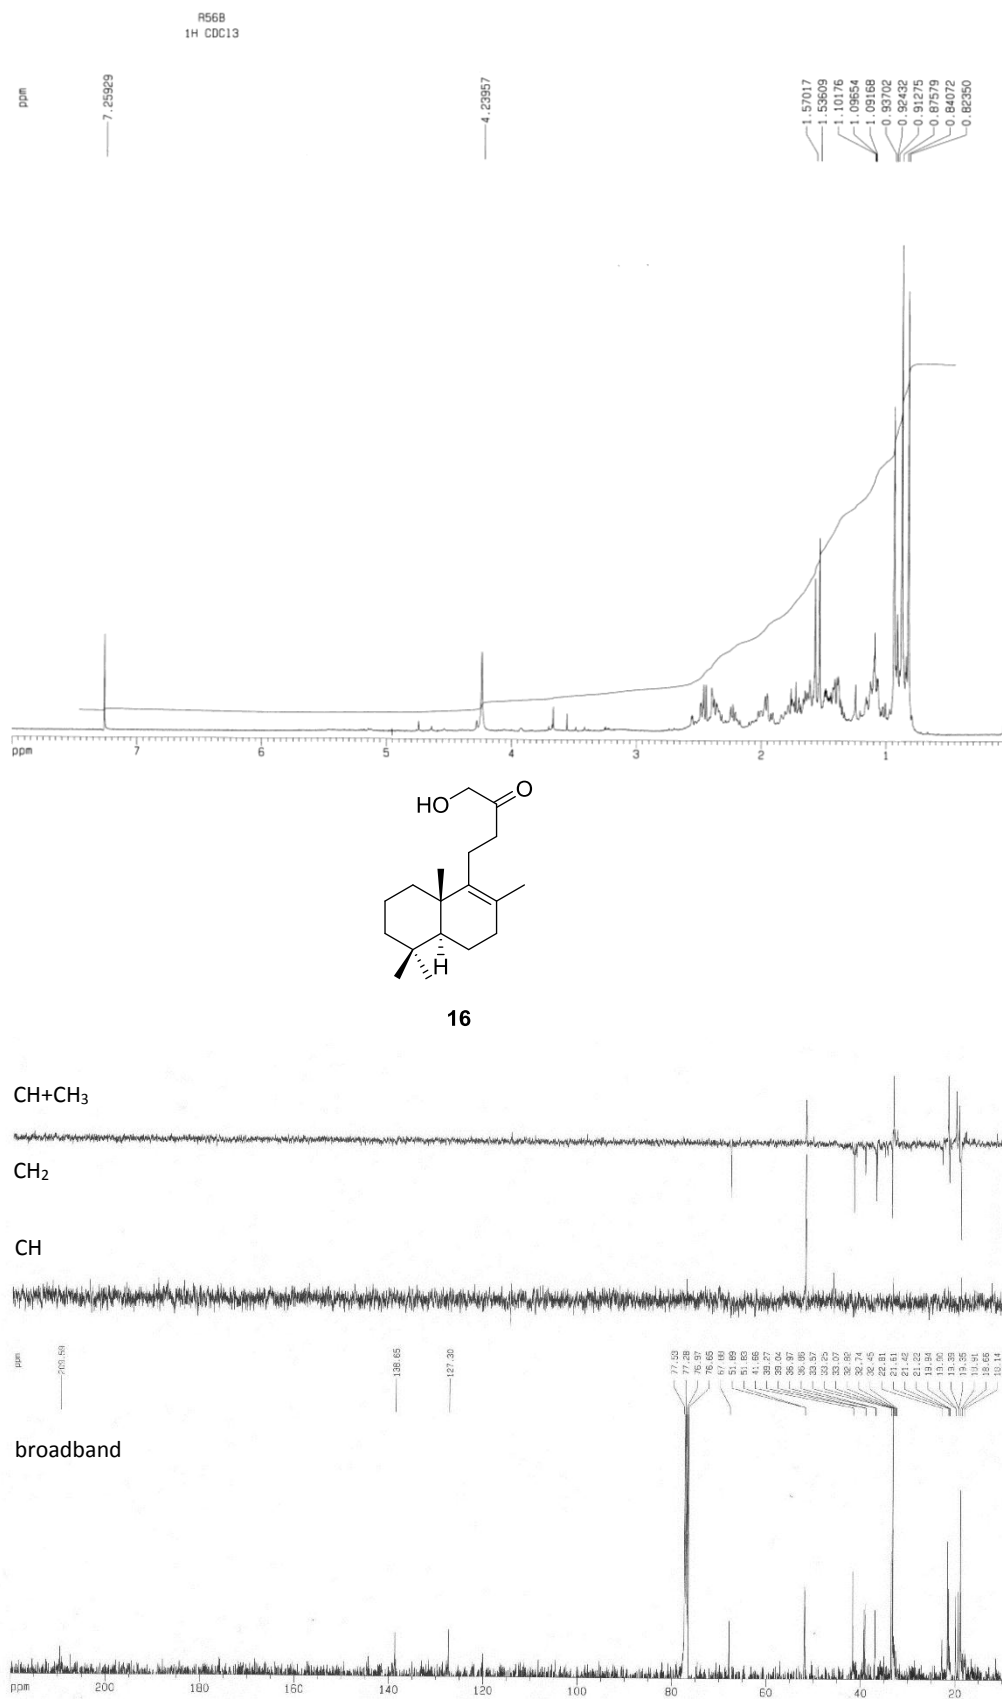Figure S1. <sup>1</sup>H-NMR CDCl<sub>3</sub> and <sup>13</sup>C-NMR CDCl<sub>3</sub>.

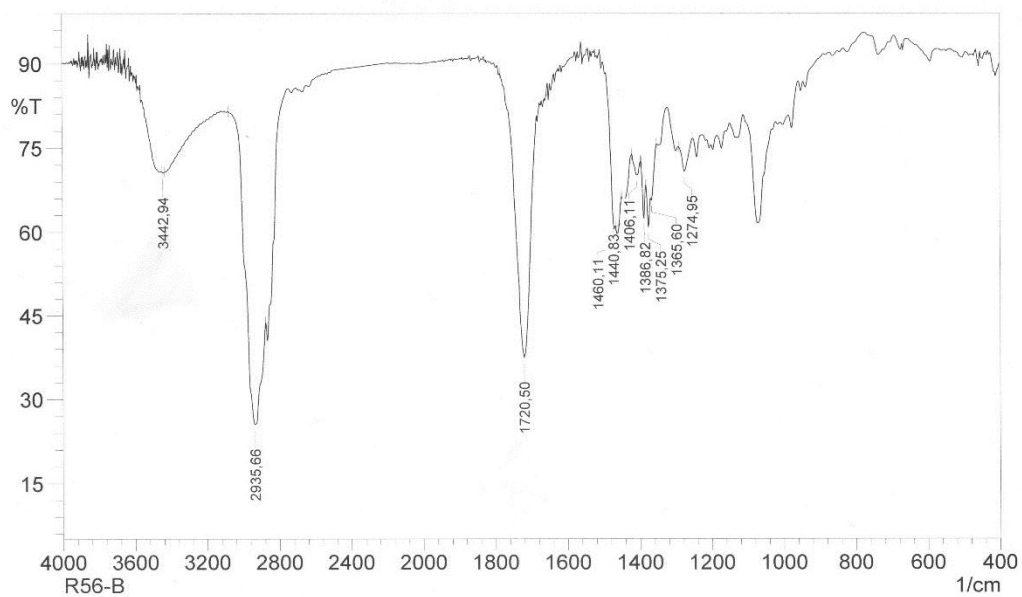

Figure S2. IR of 16.

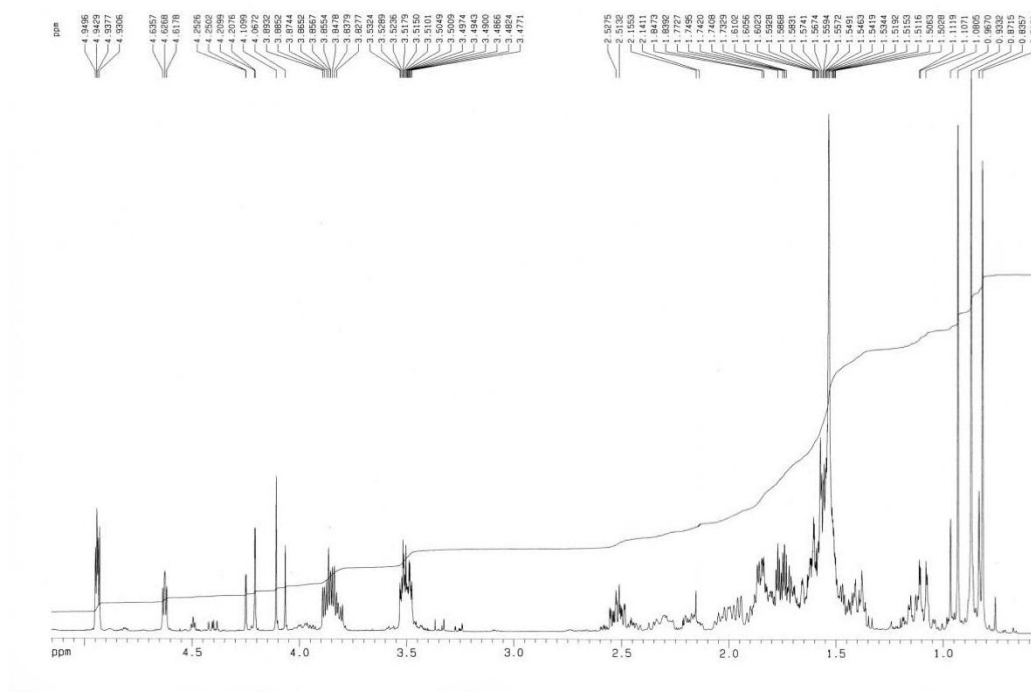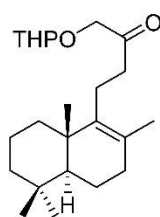

17

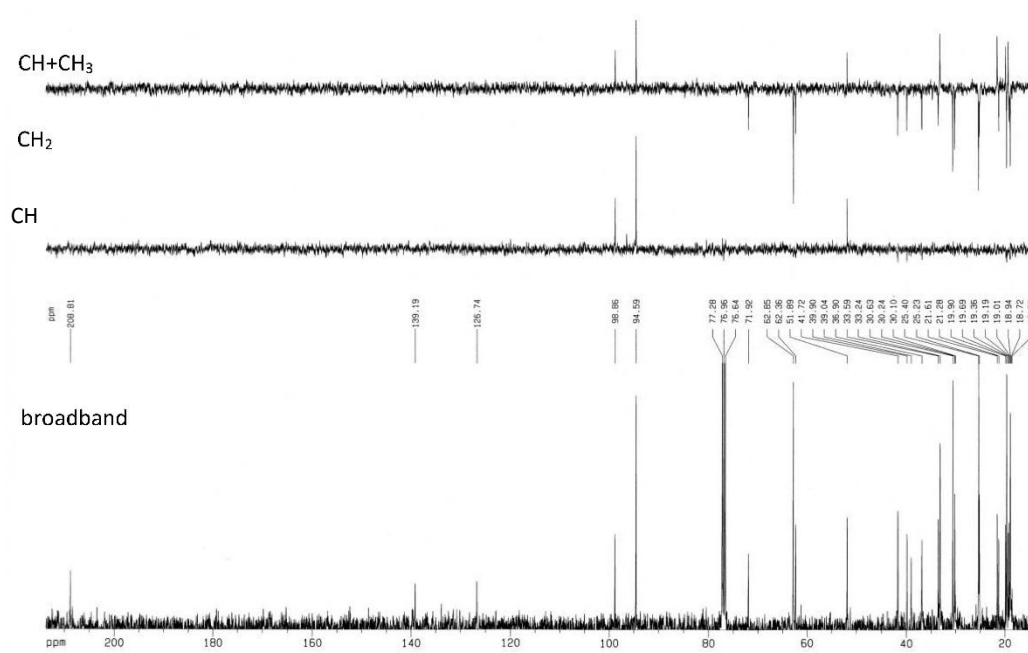Figure S3. <sup>1</sup>H-NMR CDCl<sub>3</sub> and <sup>13</sup>C-NMR CDCl<sub>3</sub>.

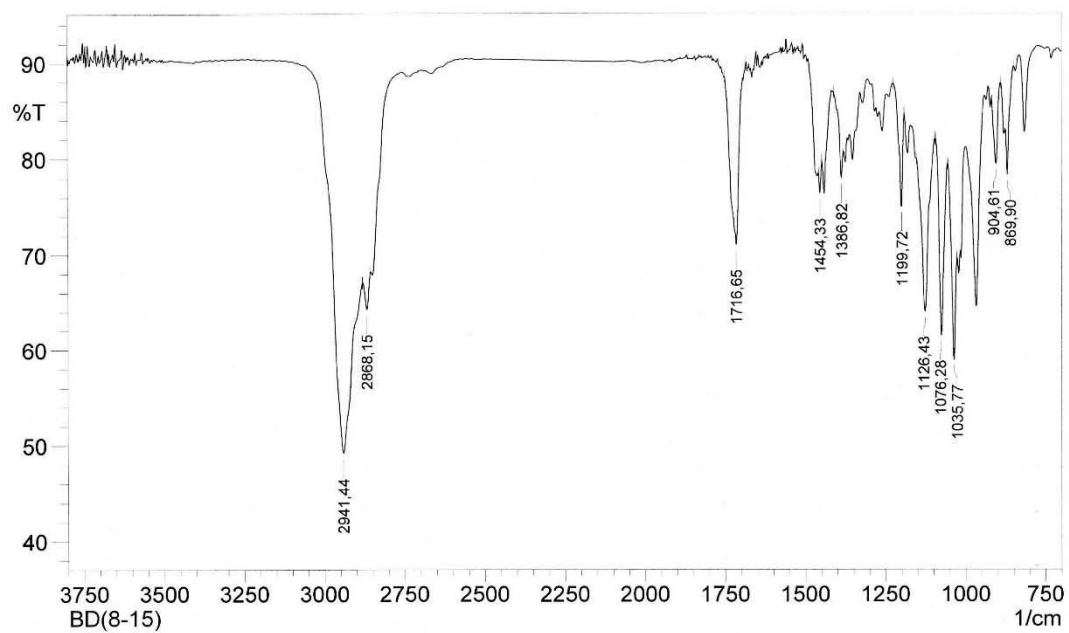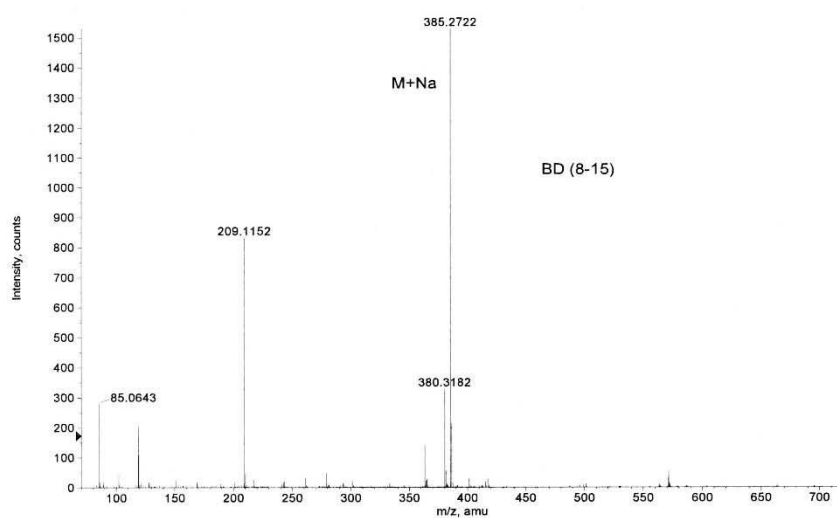

| Formula       | CalculatedMass | mDaError | ppmError | RDB |
|---------------|----------------|----------|----------|-----|
| C23 H38 O3 Na | 385.271317     | 0.88344  | 2.293025 | 4.5 |

**Figure S4.** IR and HRMS of **17**.

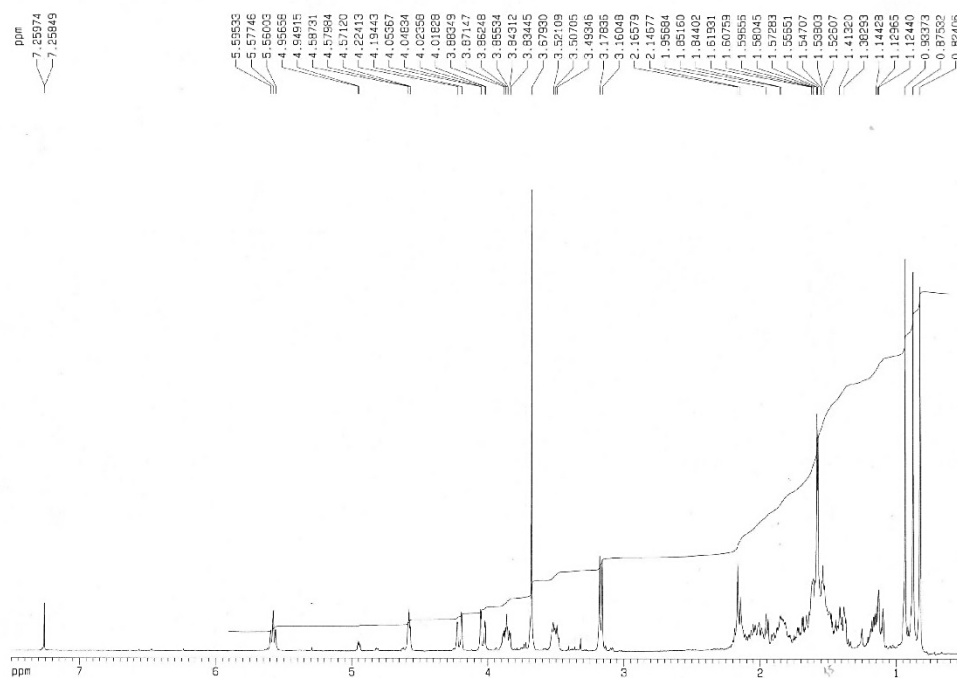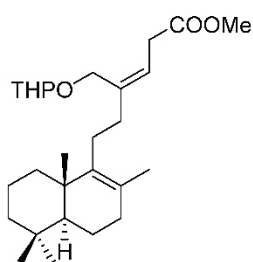

18

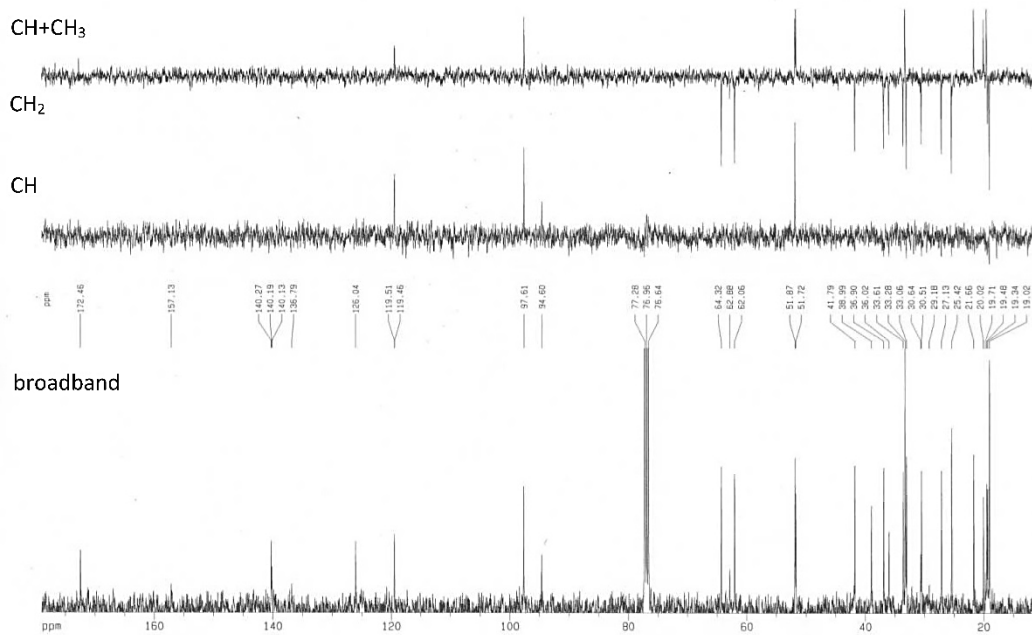

Figure S5. <sup>1</sup>H-NMR CDCl<sub>3</sub> and <sup>13</sup>C-NMR CDCl<sub>3</sub>.



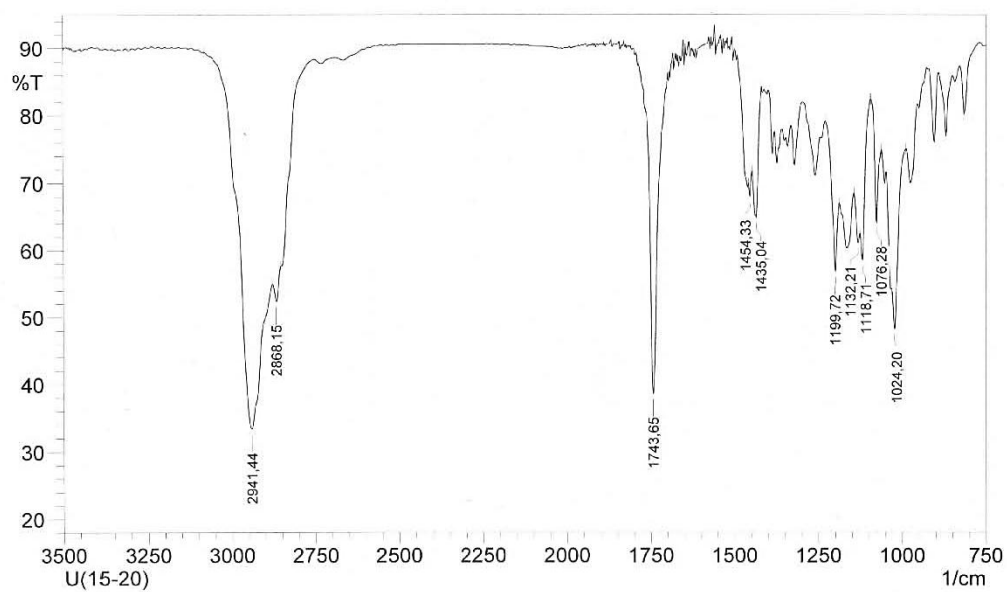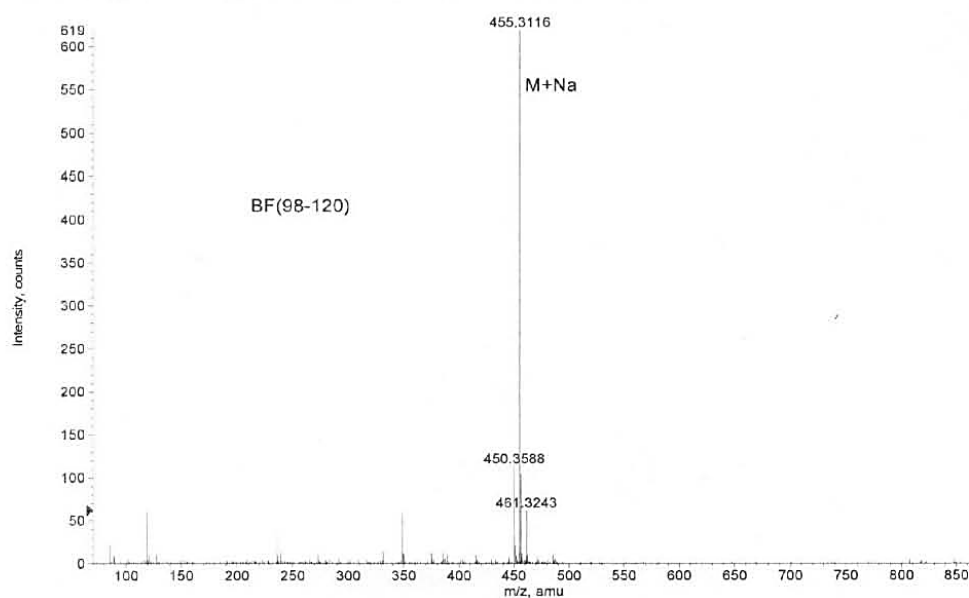

| Formula                                                          | CalculatedMass | mDaError  | ppmError  | RDB  |
|------------------------------------------------------------------|----------------|-----------|-----------|------|
| C <sub>24</sub> H <sub>43</sub> N <sub>2</sub> O <sub>6</sub>    | 455.311564     | 0.036004  | 0.079075  | 4.5  |
| C <sub>23</sub> H <sub>40</sub> N <sub>6</sub> O <sub>2</sub> Na | 455.310496     | 1.103952  | 2.424605  | 6.5  |
| C <sub>25</sub> H <sub>39</sub> N <sub>6</sub> O <sub>2</sub>    | 455.312901     | -1.301308 | -2.858057 | 9.5  |
| C <sub>21</sub> H <sub>35</sub> N <sub>12</sub>                  | 455.310216     | 1.384084  | 3.039857  | 10.5 |
| C <sub>27</sub> H <sub>44</sub> O <sub>4</sub> Na                | 455.313181     | -1.58144  | -3.473309 | 5.5  |

**Figure S6.** IR and HRMS of 18.

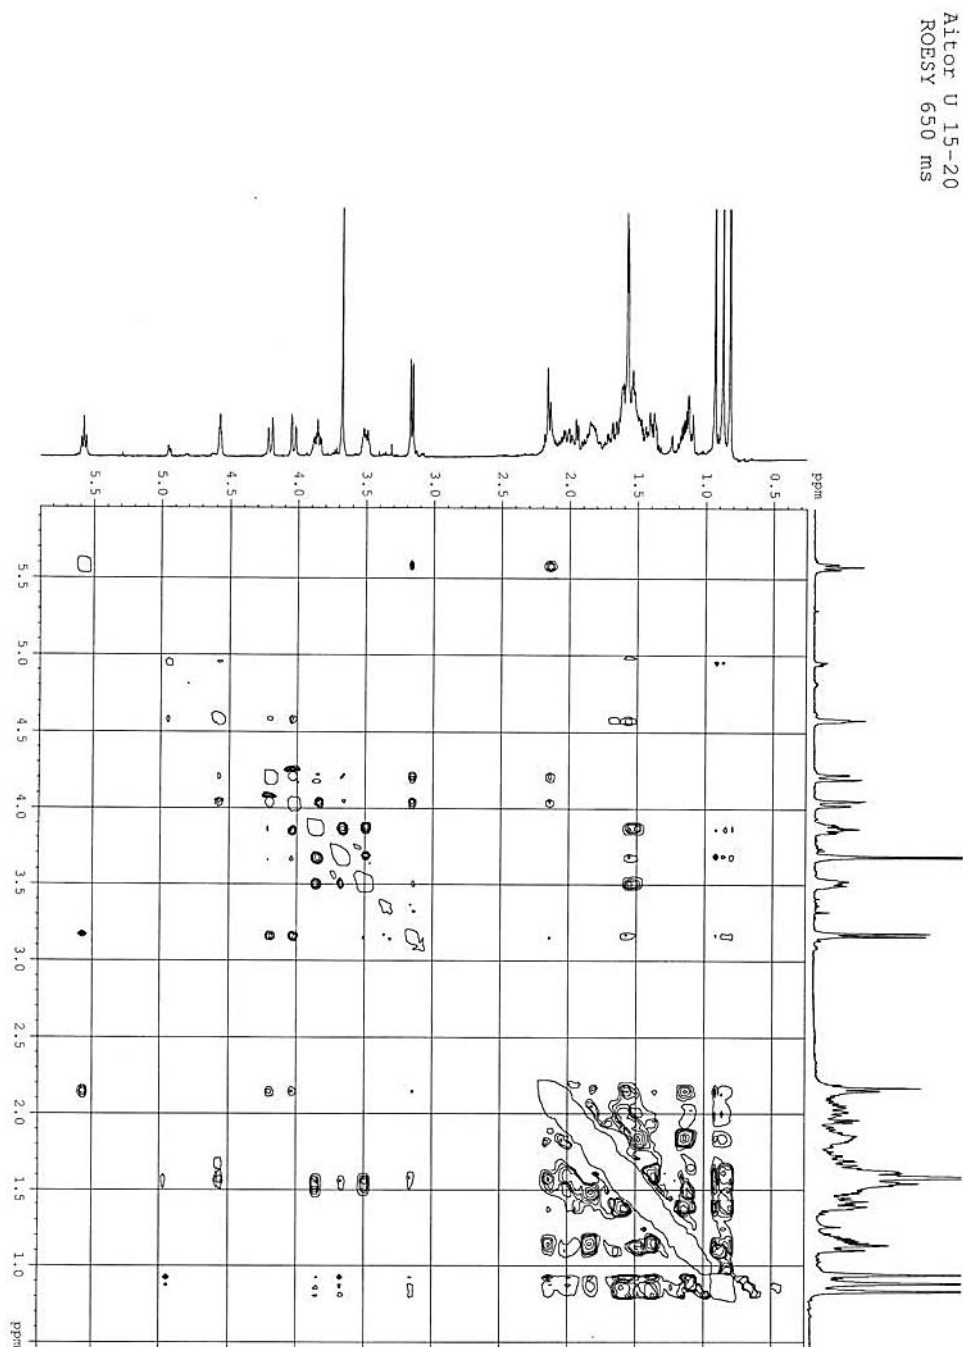

Figure S7. ROESY of 18.

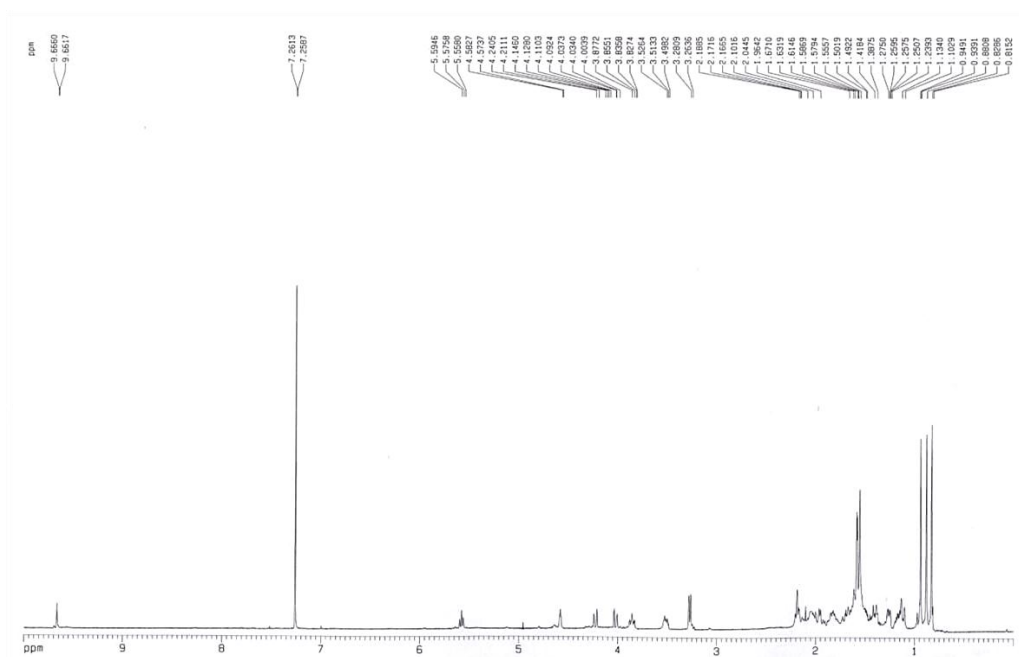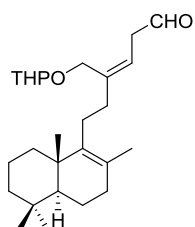

19

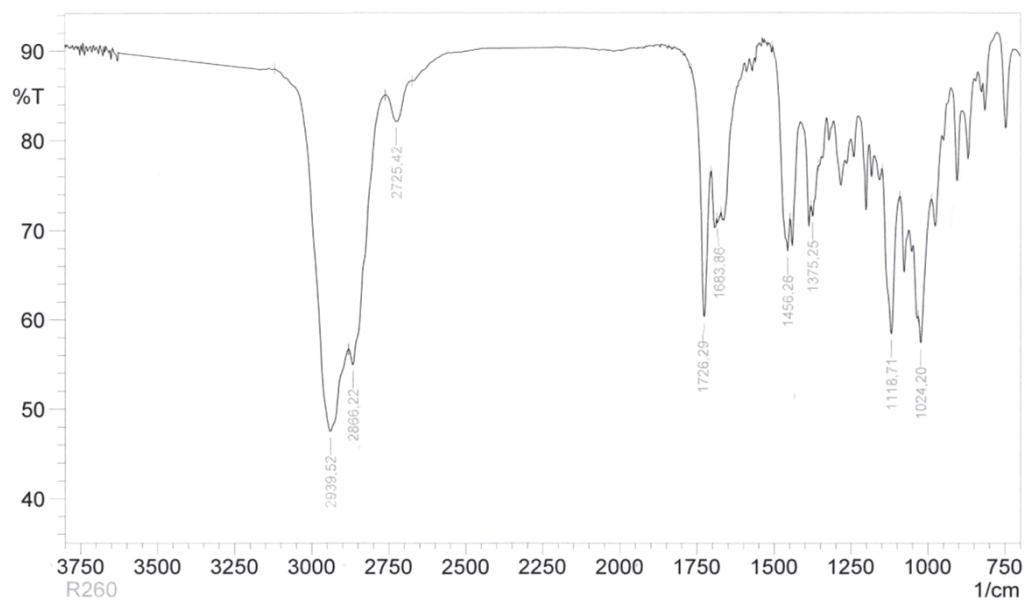Figure S8.  $^1\text{H-NMR}$   $\text{CDCl}_3$  and IR.

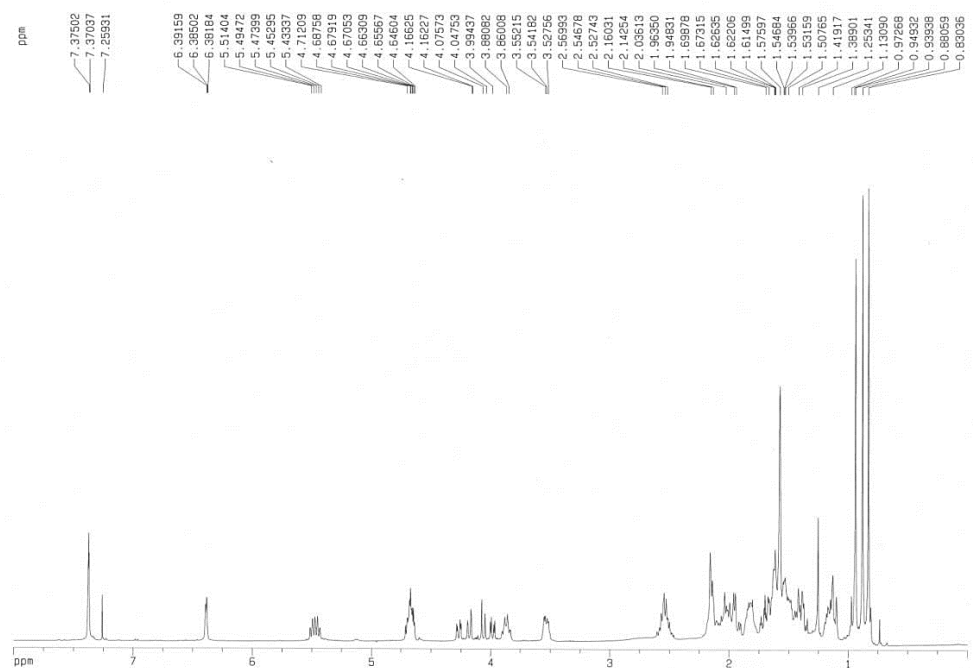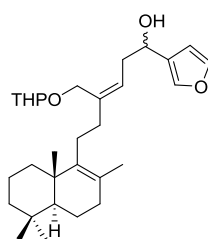

20a/20b

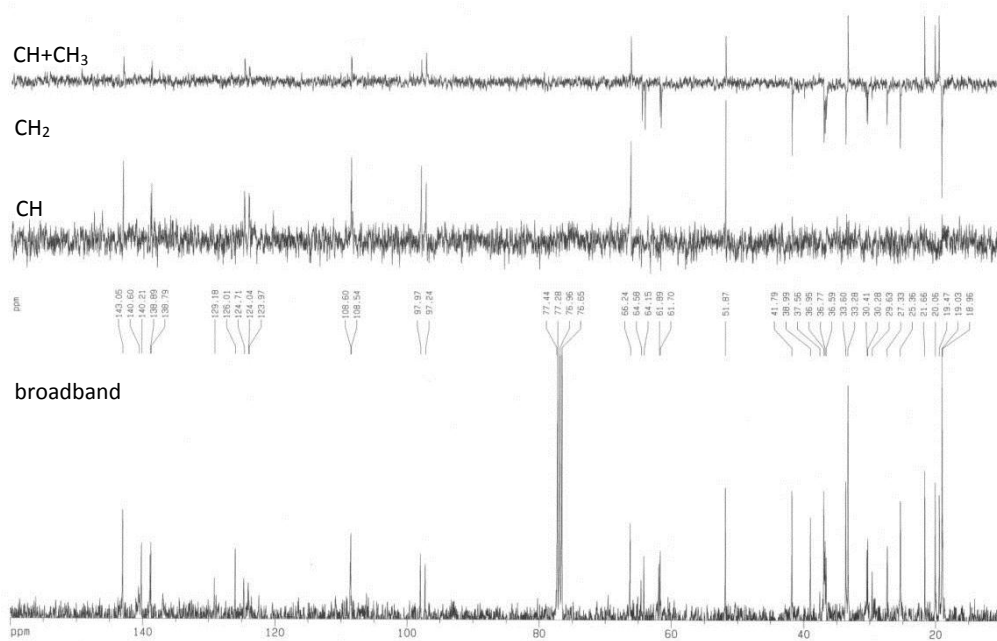Figure S9. <sup>1</sup>H-NMR CDCl<sub>3</sub> and <sup>13</sup>C-NMR CDCl<sub>3</sub>.

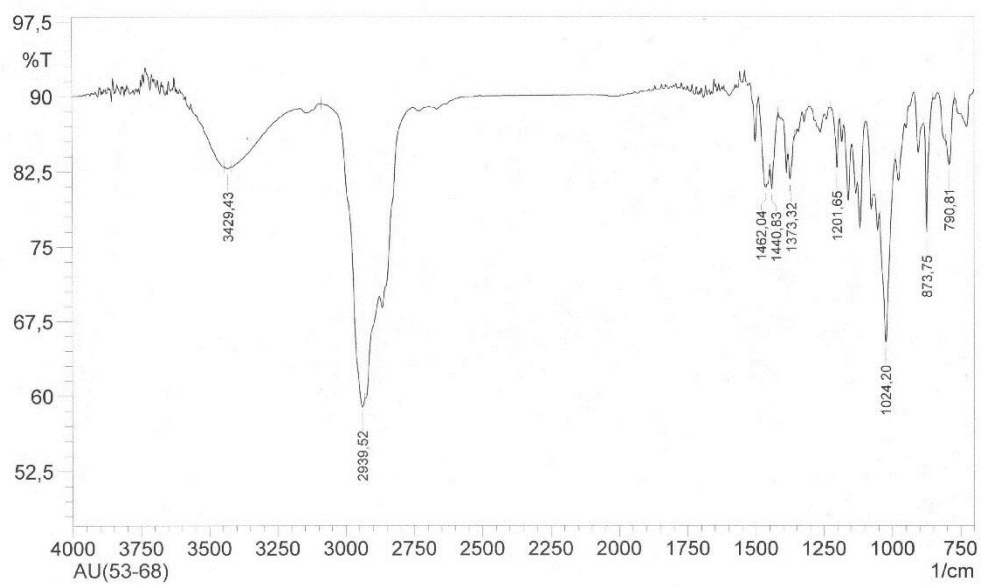

**Figure S10.** IR and HRMS of 20a/20b.



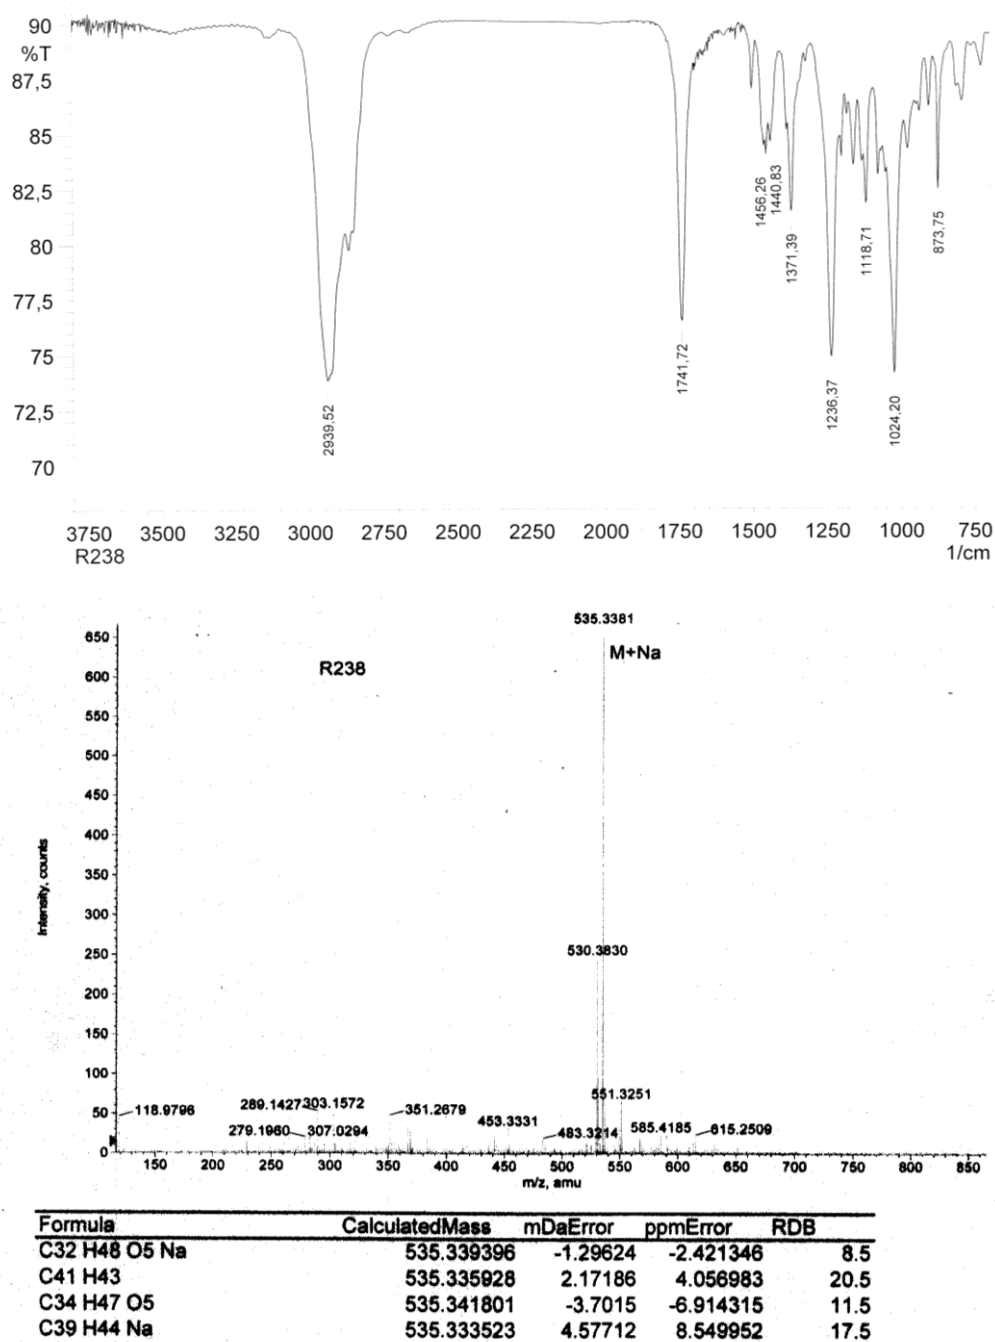

Figure S12. IR and HRMS of 21a/21b.

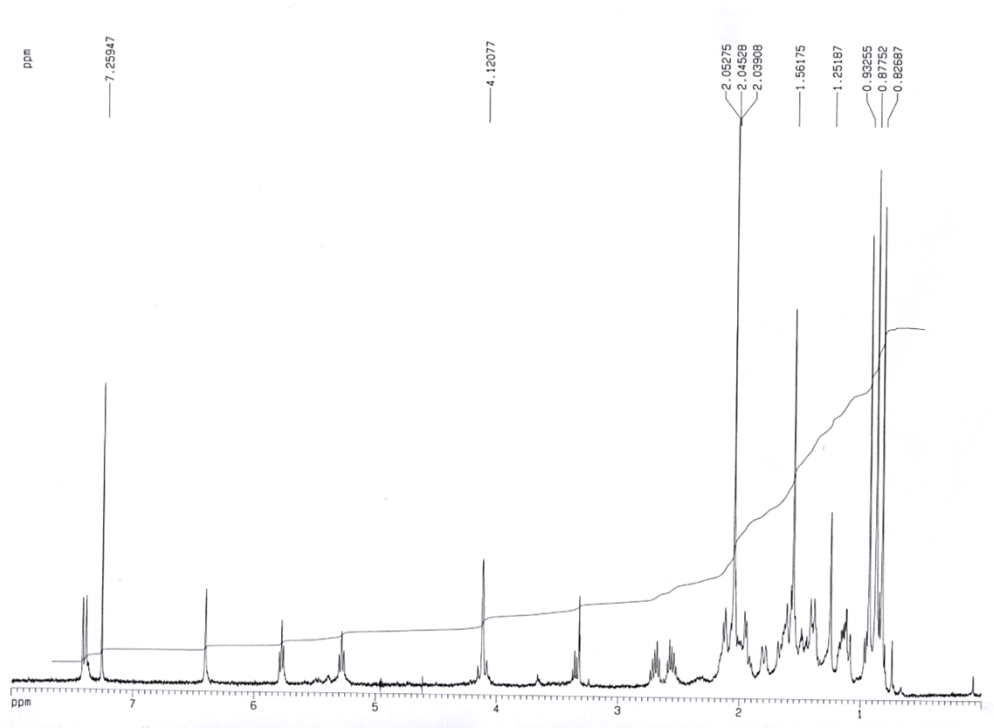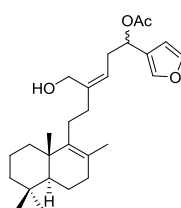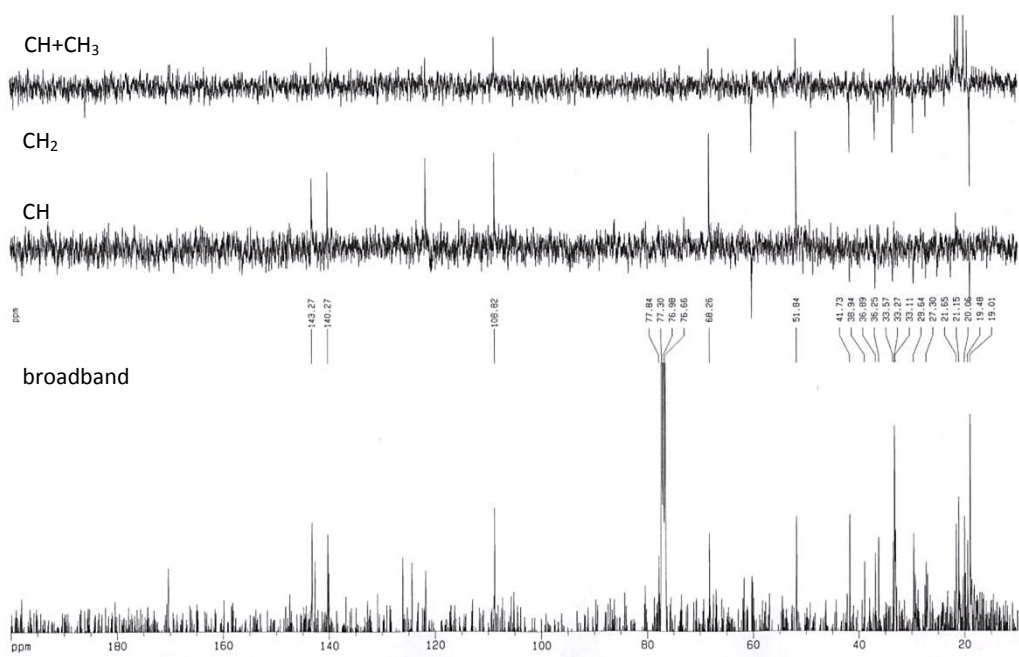

Figure S13. <sup>1</sup>H-NMR CDCl<sub>3</sub> and <sup>13</sup>C-NMR CDCl<sub>3</sub>.



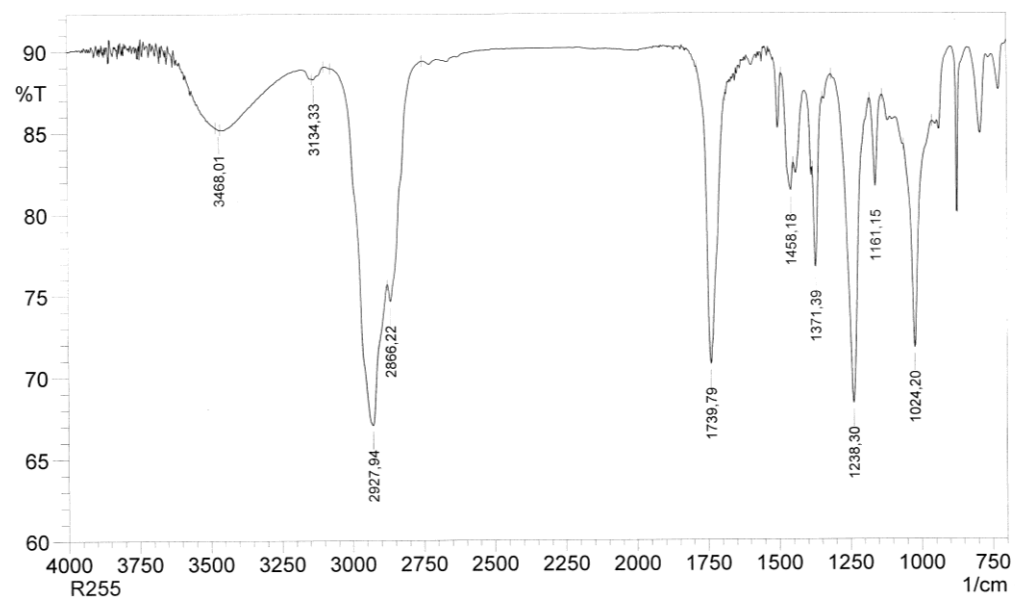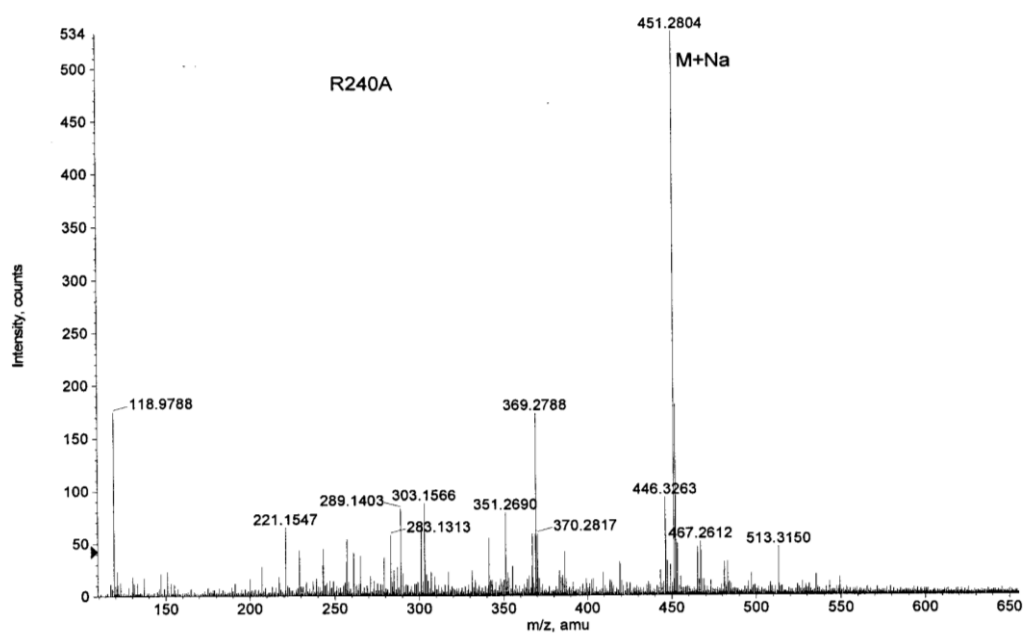

| Formula       | CalculatedMass | mDaError | ppmError | RDB  |
|---------------|----------------|----------|----------|------|
| C27 H40 O4 Na | 451.281881     | -1.48128 | -3.28239 | 7.5  |
| C29 H39 O4    | 451.284287     | -3.88654 | -8.61224 | 10.5 |

**Figure S14.** IR and HRMS of 22a/22b.

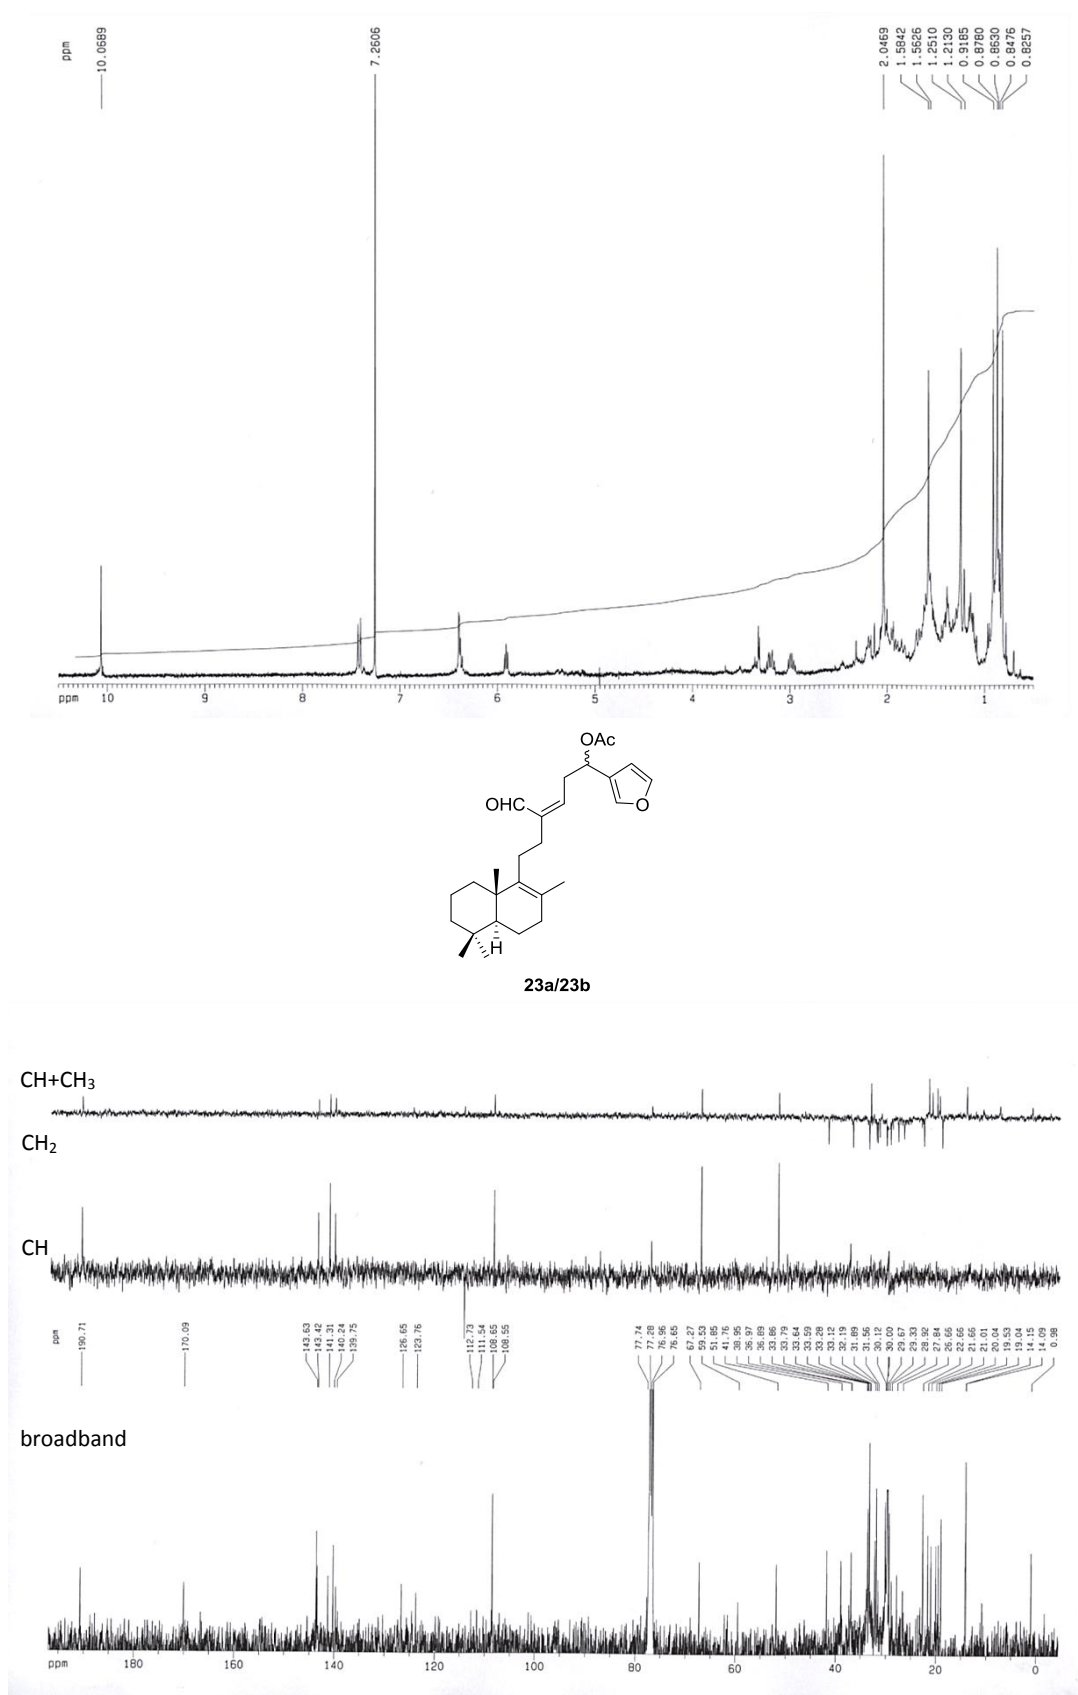

Figure S15.  $^1\text{H}$ -NMR  $\text{CDCl}_3$  and  $^{13}\text{C}$ -NMR  $\text{CDCl}_3$ .

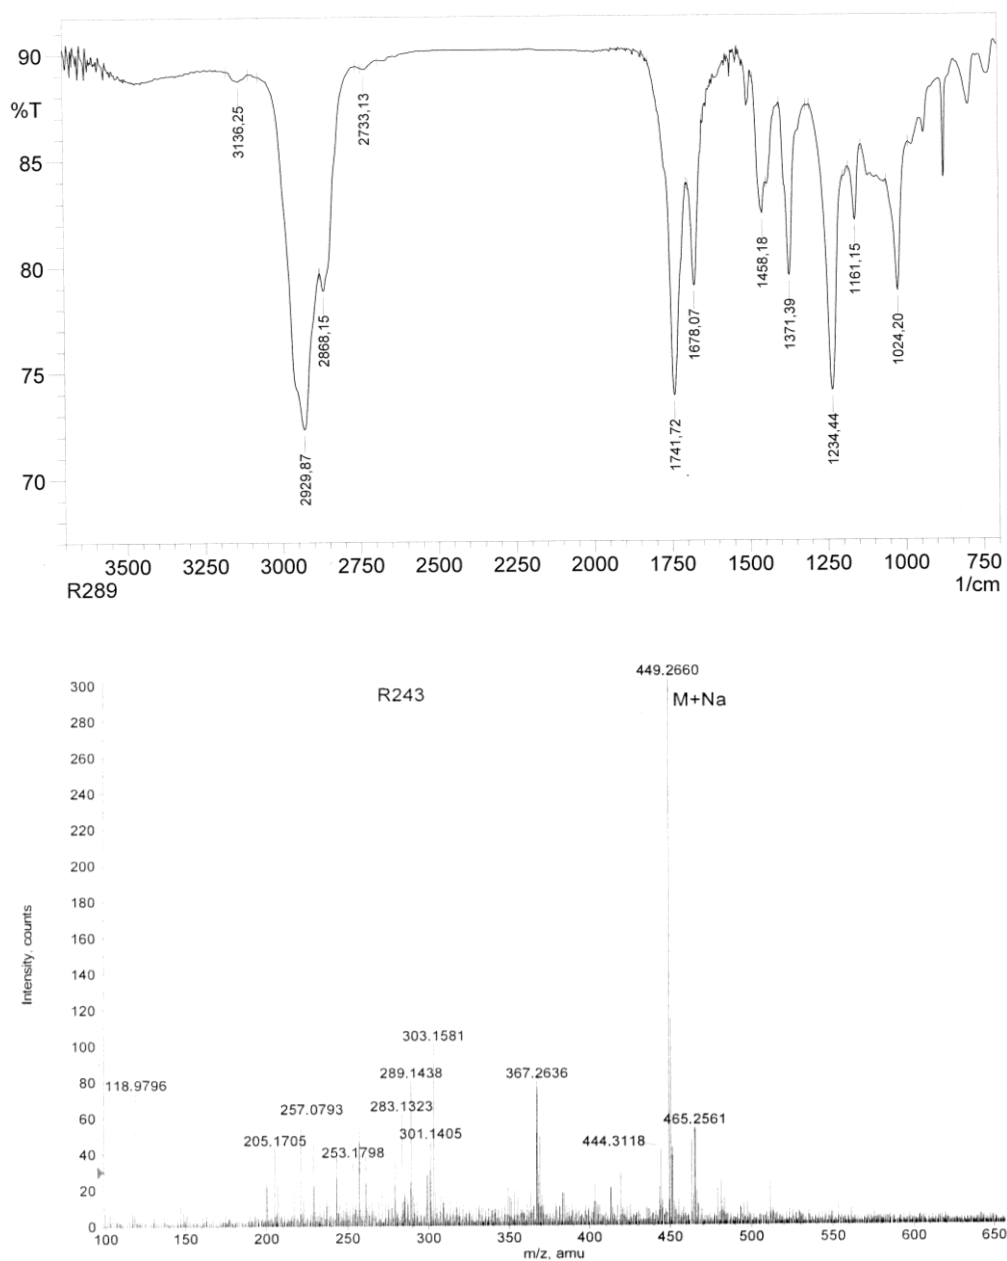

| Formula                                           | CalculatedMass | mDaError | ppmError  | RDB  |
|---------------------------------------------------|----------------|----------|-----------|------|
| C <sub>27</sub> H <sub>38</sub> O <sub>4</sub> Na | 449.266231     | -0.2312  | -0.514617 | 8.5  |
| C <sub>29</sub> H <sub>37</sub> O <sub>4</sub>    | 449.268636     | -2.63646 | -5.868365 | 11.5 |

**Figure S16.** IR and HRMS of 23a/23b.

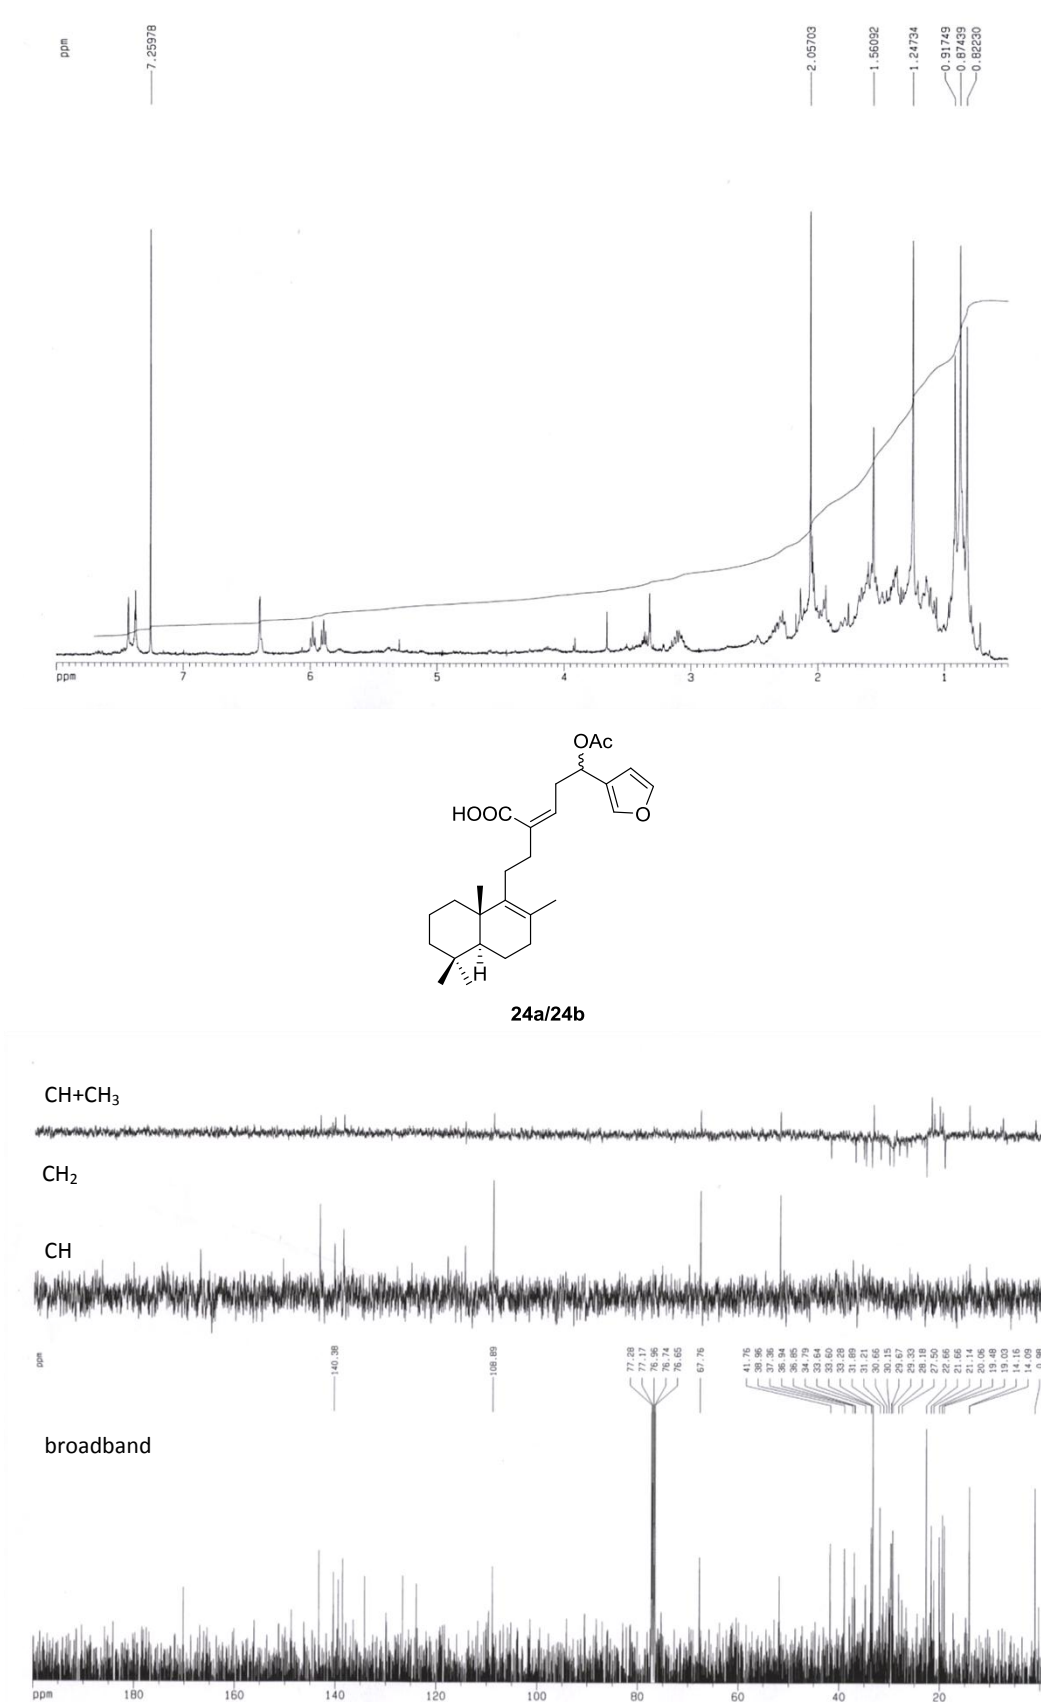

**Figure S17.**  $^1\text{H-NMR}$   $\text{CDCl}_3$  and  $^{13}\text{C-NMR}$   $\text{CDCl}_3$ .

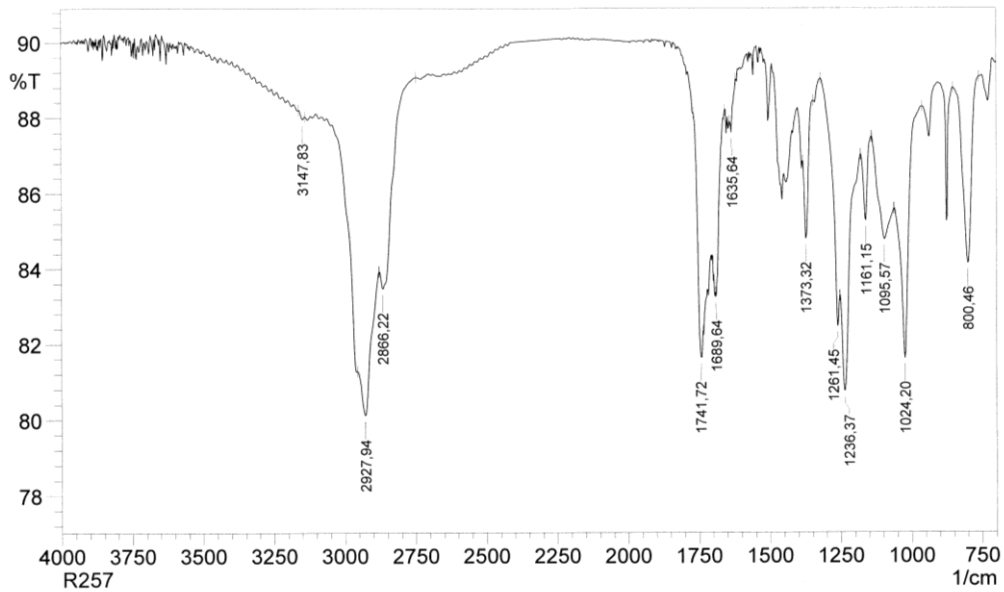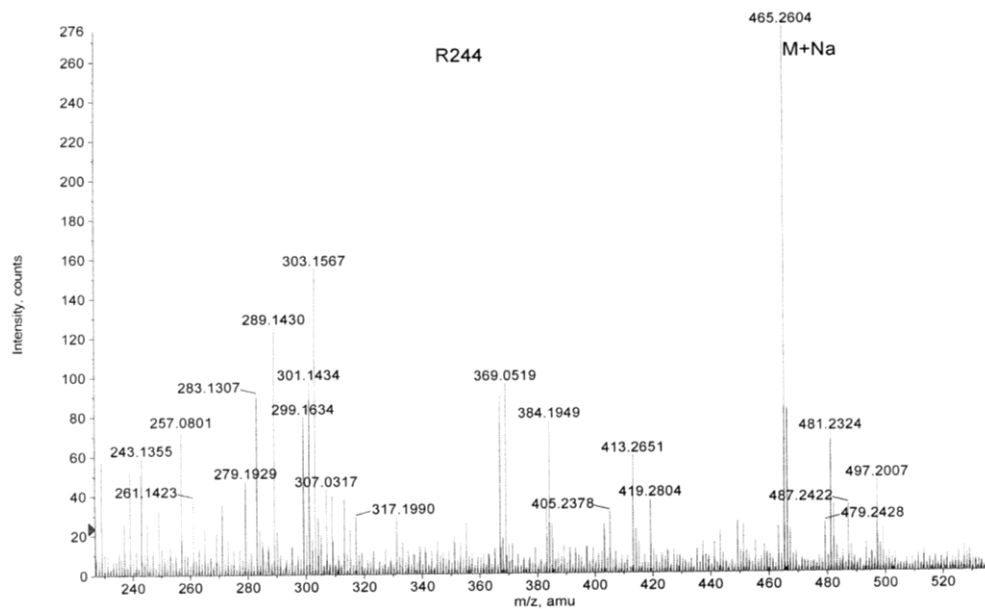

| Formula          | CalculatedMass | mDaError  | ppmError  | RDB  |
|------------------|----------------|-----------|-----------|------|
| C25 H33 N6 O3    | 465.260866     | -0.465708 | -1.000961 | 12.5 |
| C27 H38 O5 Na    | 465.261146     | -0.74584  | -1.603057 | 8.5  |
| C24 H37 N2 O7    | 465.259528     | 0.871604  | 1.873366  | 7.5  |
| C23 H34 N6 O3 Na | 465.25846      | 1.939552  | 4.16874   | 9.5  |
| C28 H34 N4 O Na  | 465.262483     | -2.083152 | -4.477384 | 13.5 |
| C13 H37 N8 O10   | 465.262716     | -2.316364 | -4.978634 | -0.5 |
| C29 H37 O5       | 465.263551     | -3.1511   | -6.772758 | 11.5 |
| C22 H38 N2 O7 Na | 465.257123     | 3.276864  | 7.043067  | 4.5  |
| C20 H33 N8 O5    | 465.256843     | 3.556996  | 7.645163  | 8.5  |
| C16 H38 N6 O8 Na | 465.264334     | -3.933808 | -8.455057 | 0.5  |
| C30 H33 N4 O     | 465.264888     | -4.488412 | -9.647085 | 16.5 |

**Figure S18.** IR and HRMS of 24a/24b.

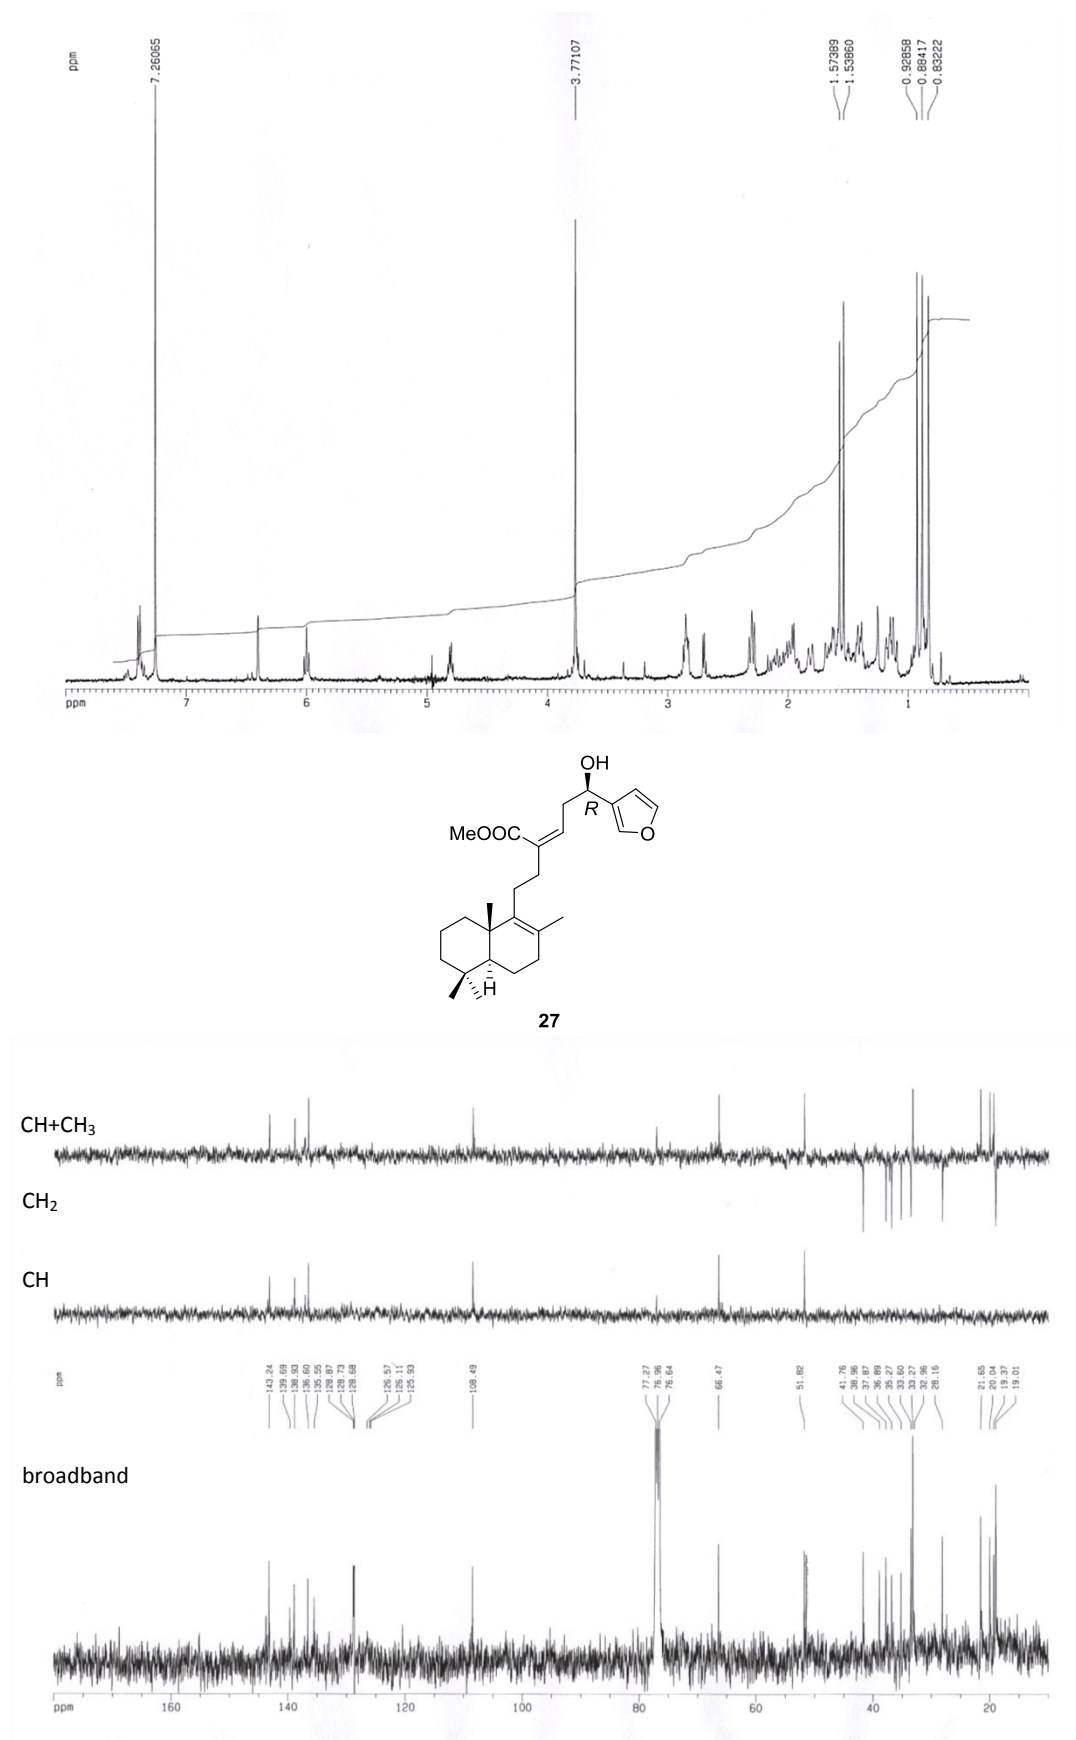Figure S19.  $^1\text{H-NMR}$   $\text{CDCl}_3$  and  $^{13}\text{C-NMR}$   $\text{CDCl}_3$ .

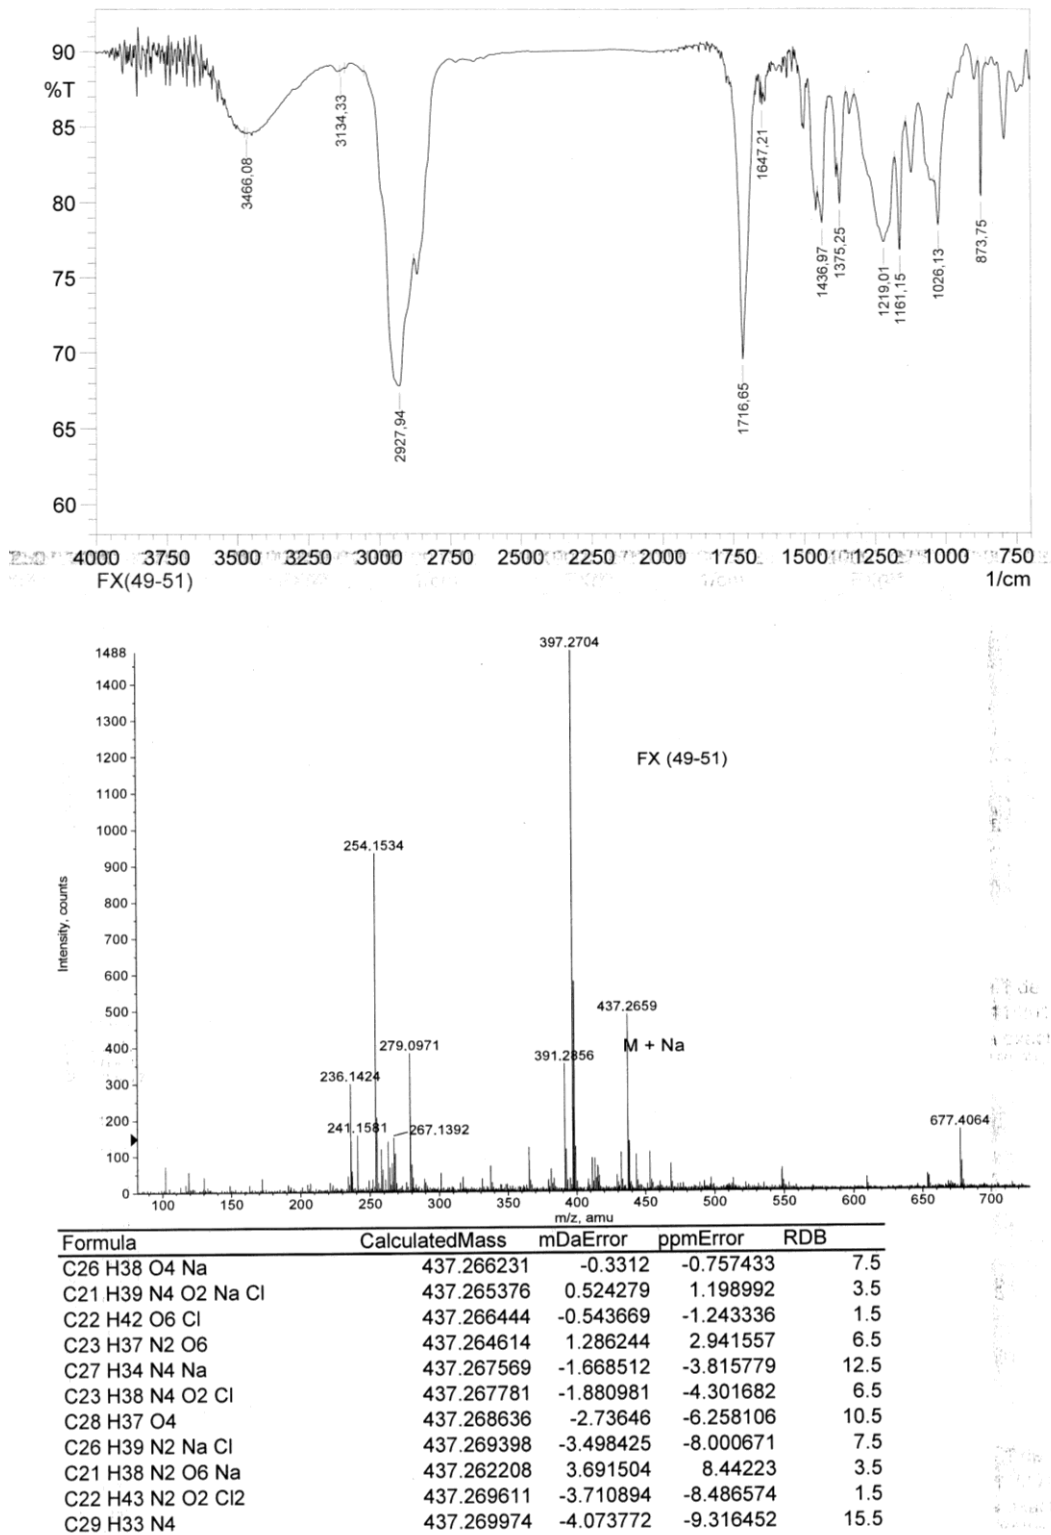

Figure S20. IR and HRMS of 27.

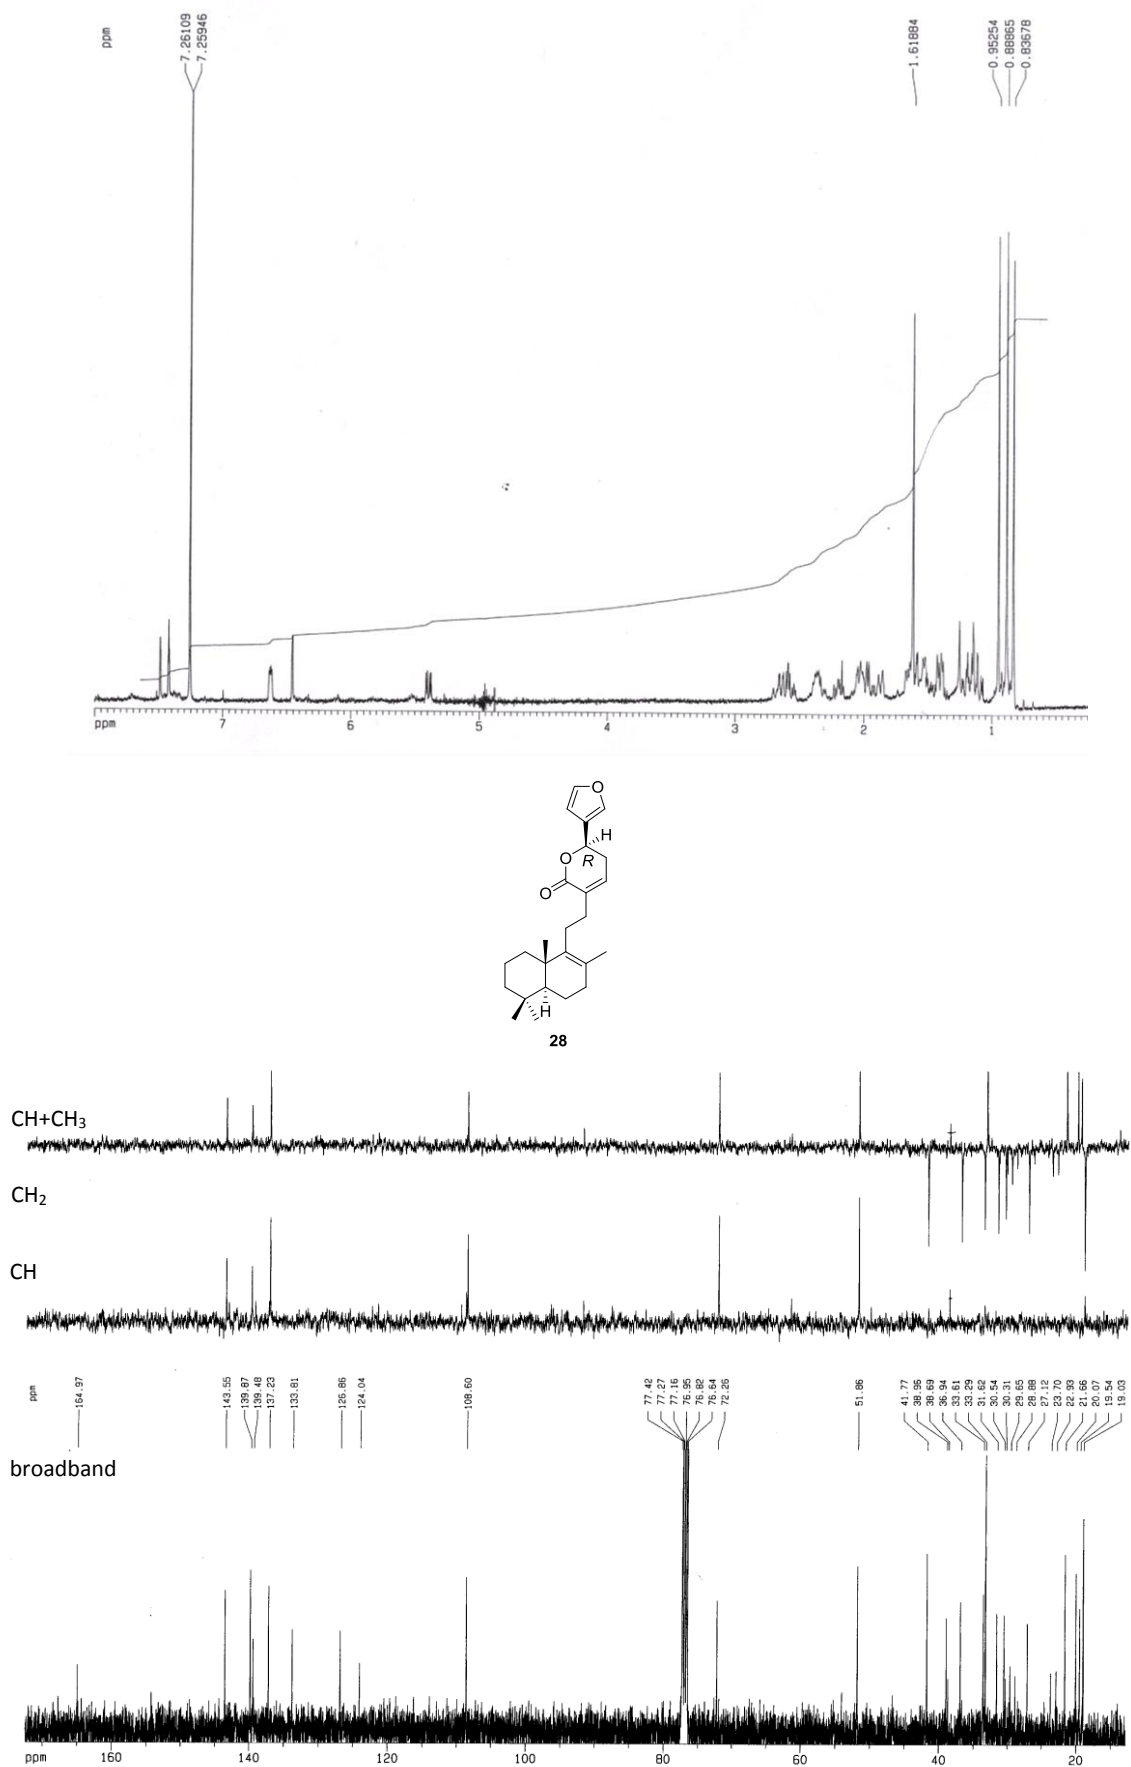Figure S21. <sup>1</sup>H-NMR CDCl<sub>3</sub> and <sup>13</sup>C-NMR CDCl<sub>3</sub>.



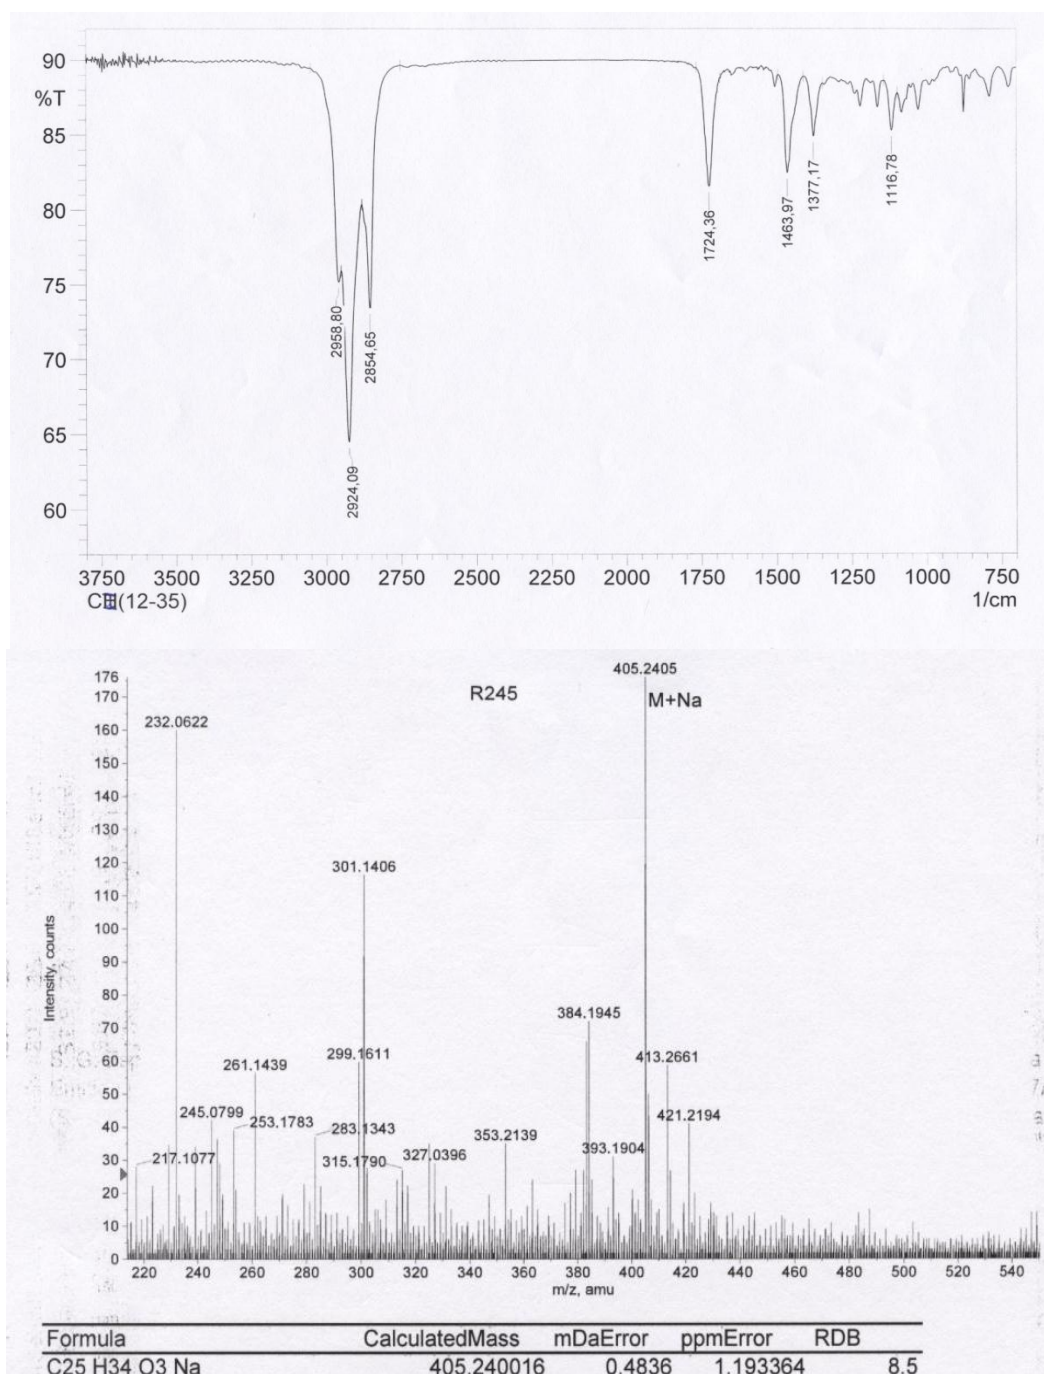

Figure S22. IR and HRMS of 28.

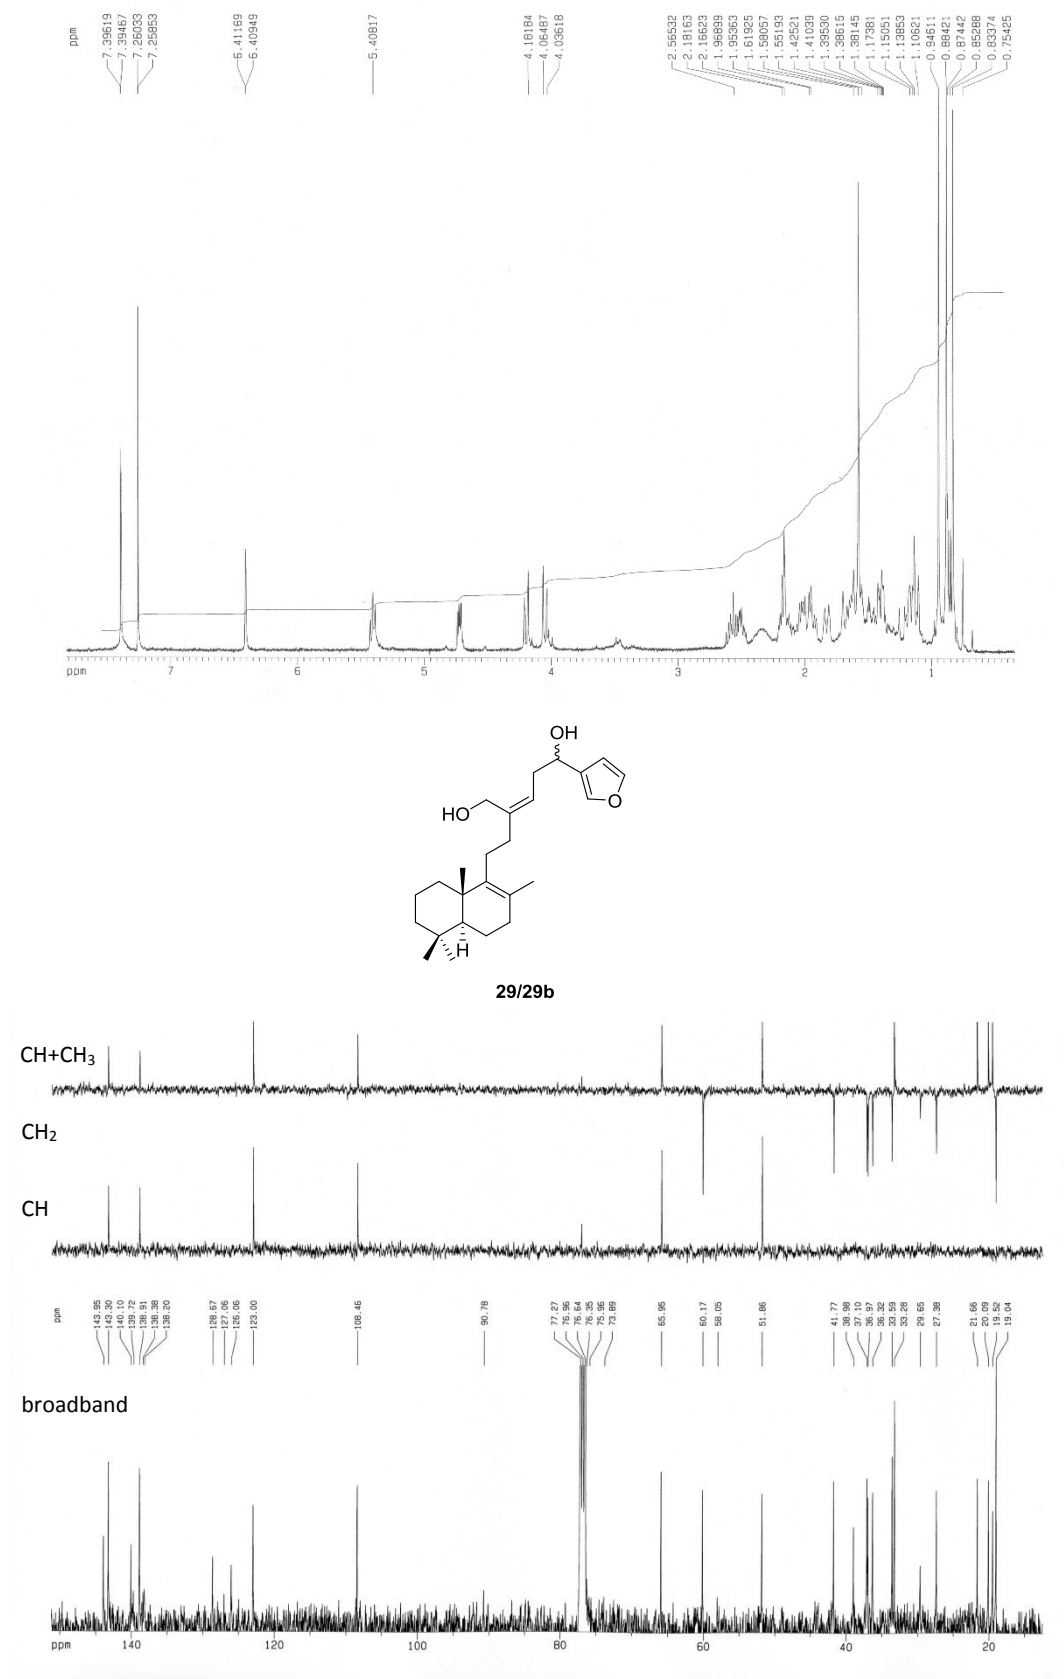

Figure S23. <sup>1</sup>H-NMR CDCl<sub>3</sub> and <sup>13</sup>C-NMR CDCl<sub>3</sub>.

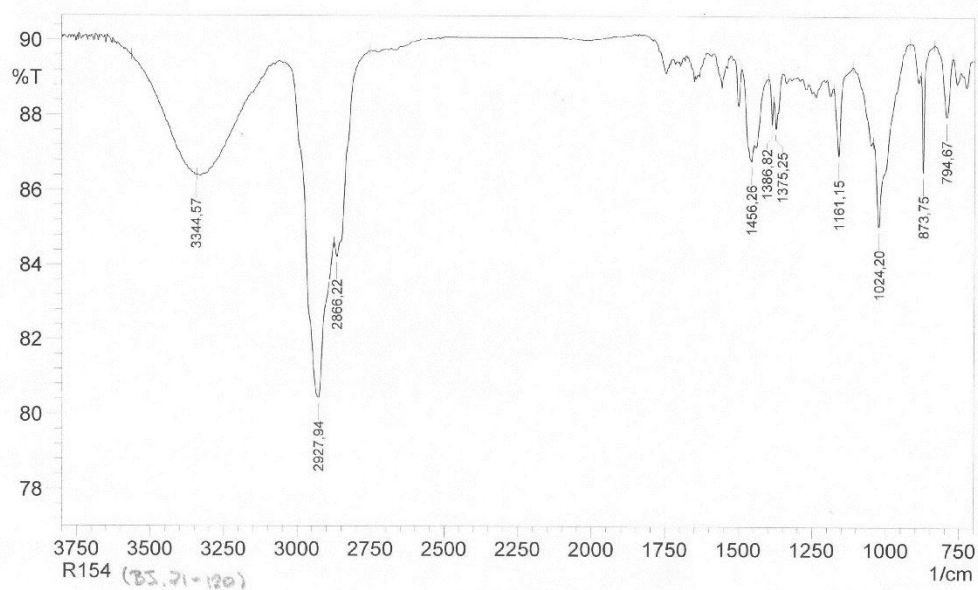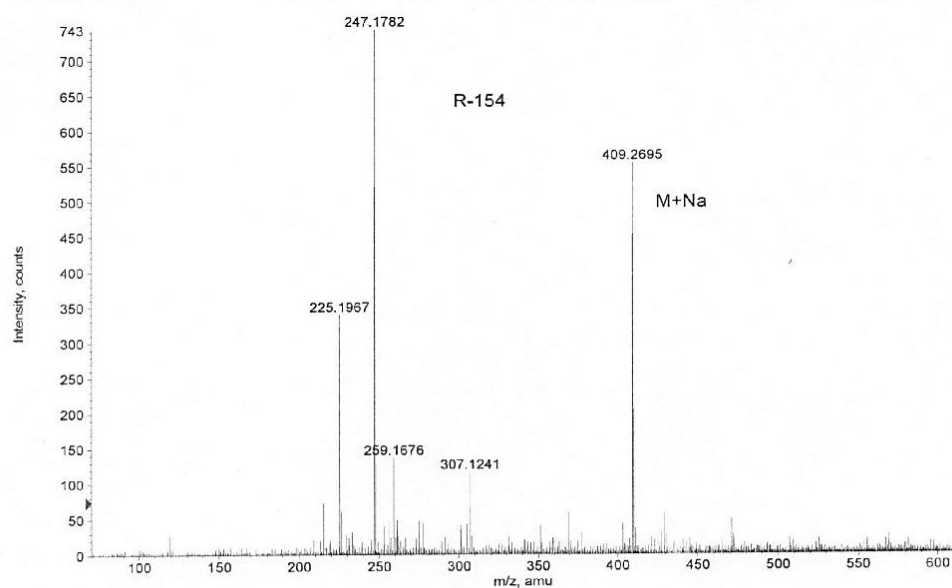

| Formula         | CalculatedMass | mDaError  | ppmError  | RDB  |
|-----------------|----------------|-----------|-----------|------|
| C22 H37 N2 O5   | 409.269699     | -0.199116 | -0.486515 | 5.5  |
| C21 H34 N6 O Na | 409.268631     | 0.868832  | 2.122882  | 7.5  |
| C23 H33 N6 O    | 409.271036     | -1.536428 | -3.754069 | 10.5 |
| C25 H38 O3 Na   | 409.271317     | -1.81656  | -4.438536 | 6.5  |

**Figure S24.** IR and HRMS of 29/29b.

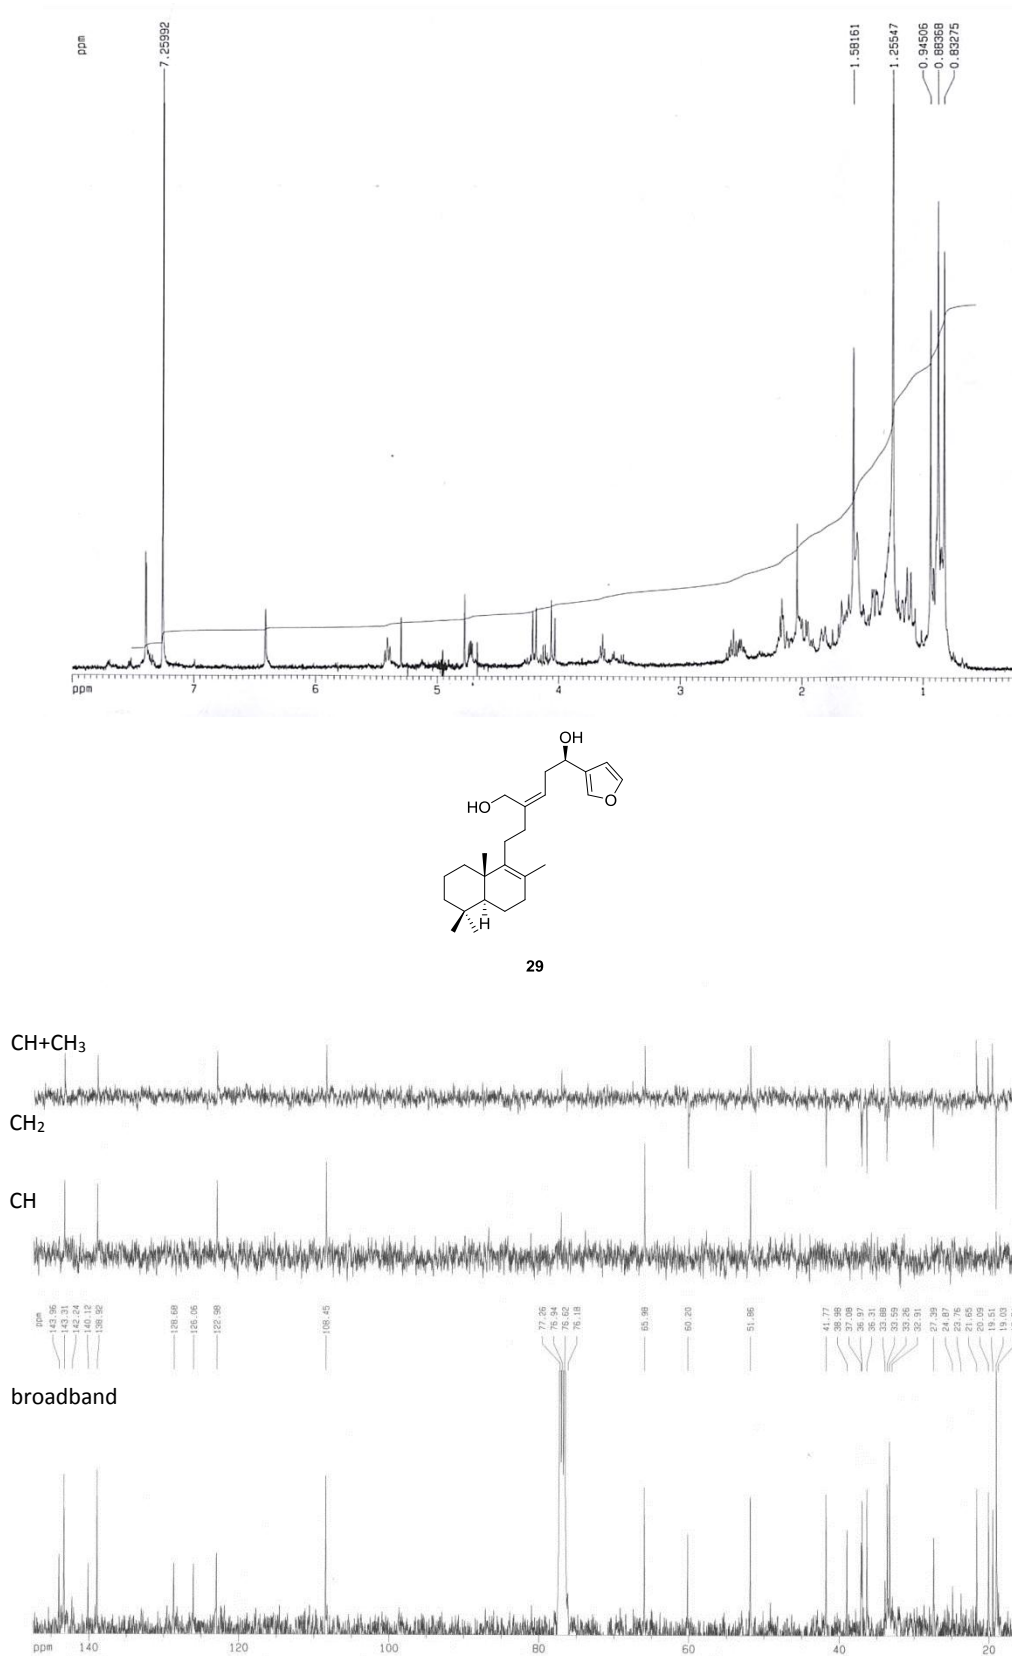

Figure S25.  $^1\text{H}$ -NMR  $\text{CDCl}_3$  and  $^{13}\text{C}$ -NMR  $\text{CDCl}_3$ .

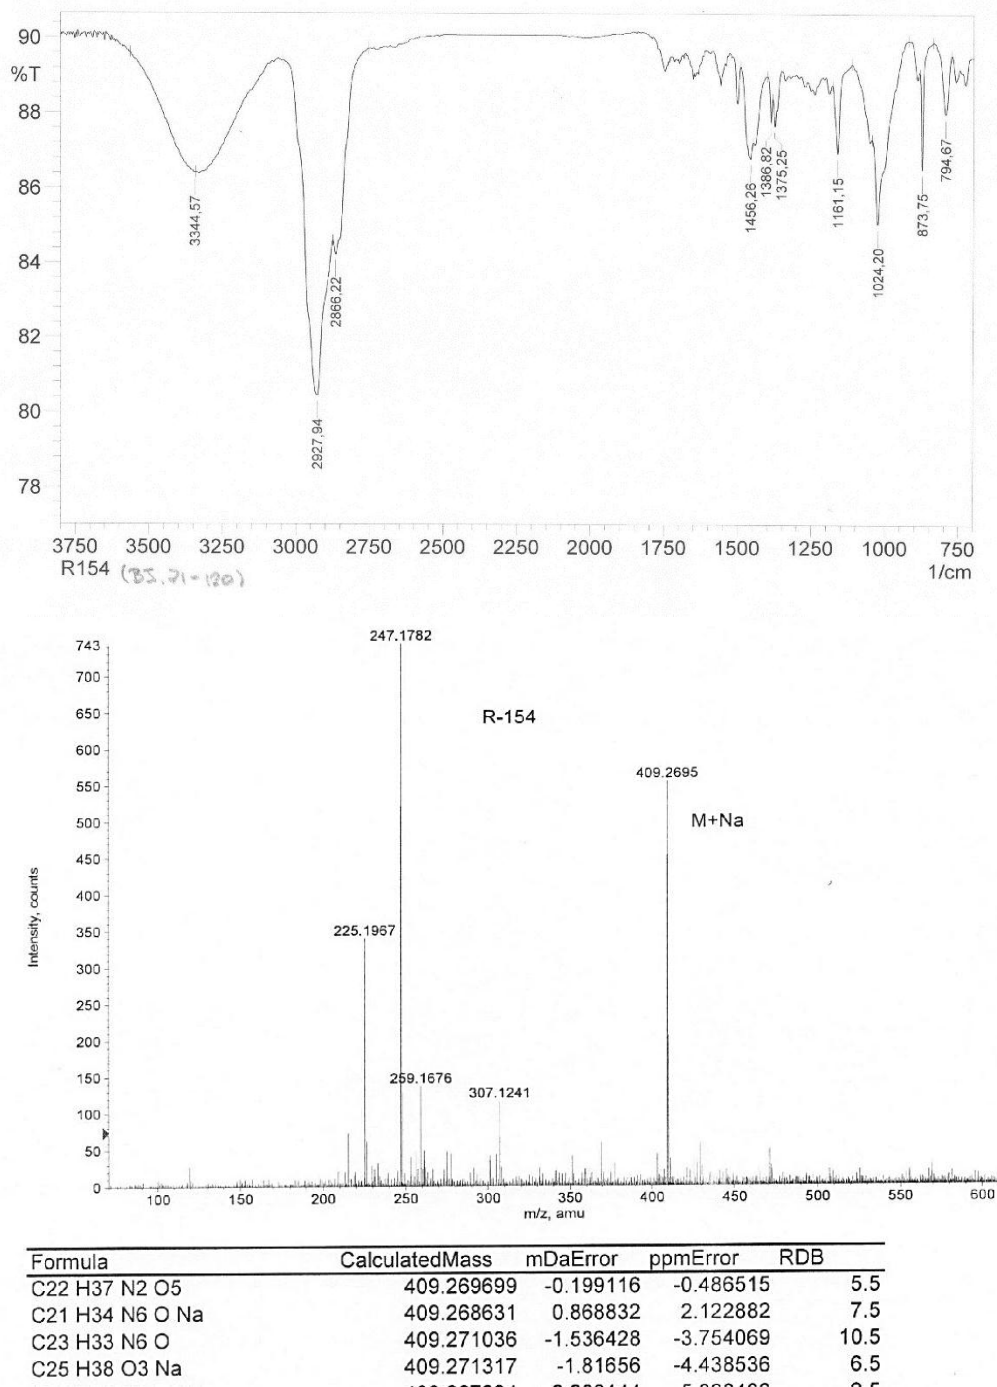

Figure S26. IR and HRMS of 29.

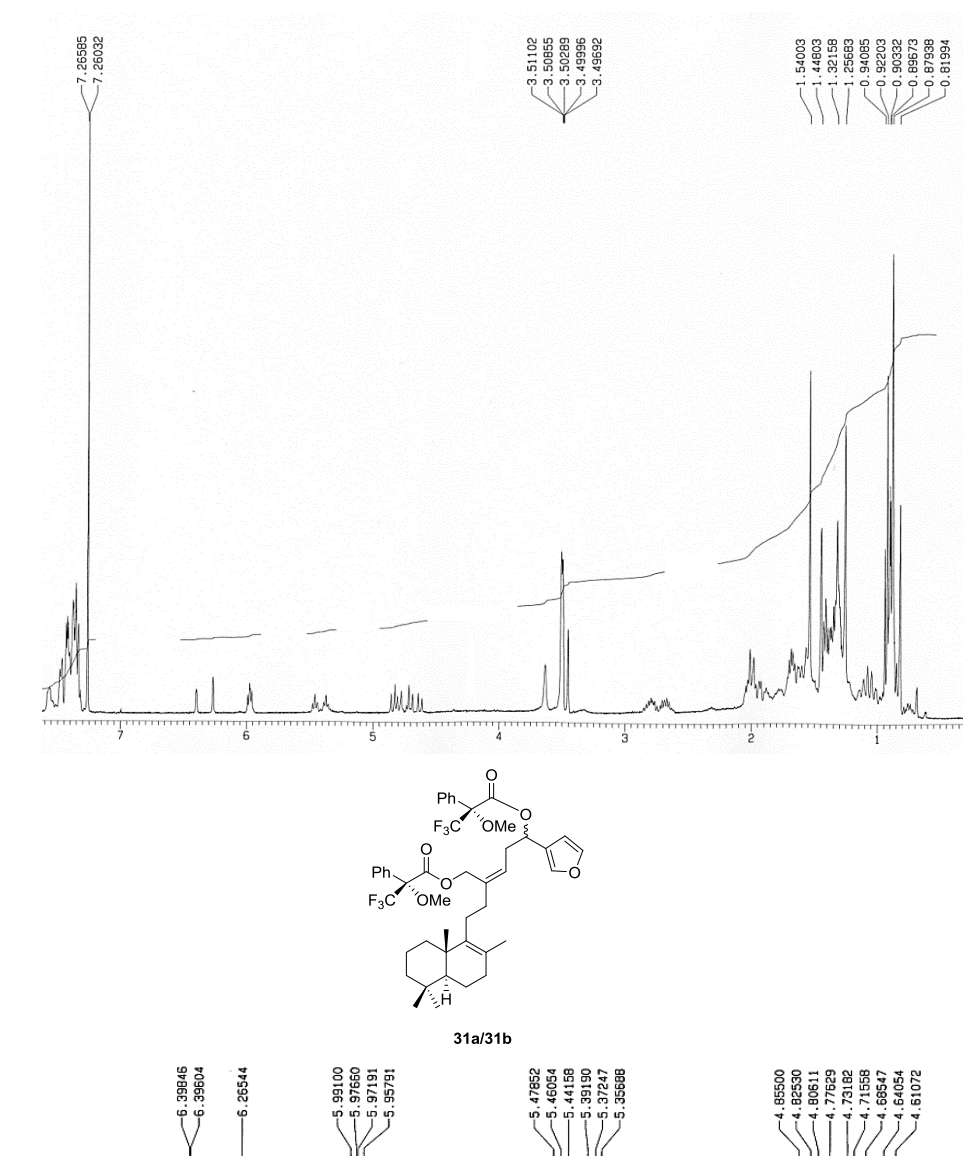

**Figure S27.**  $^1\text{H-NMR}$   $\text{CDCl}_3$  and expansion of  $^1\text{H-NMR}$   $\text{CDCl}_3$ .

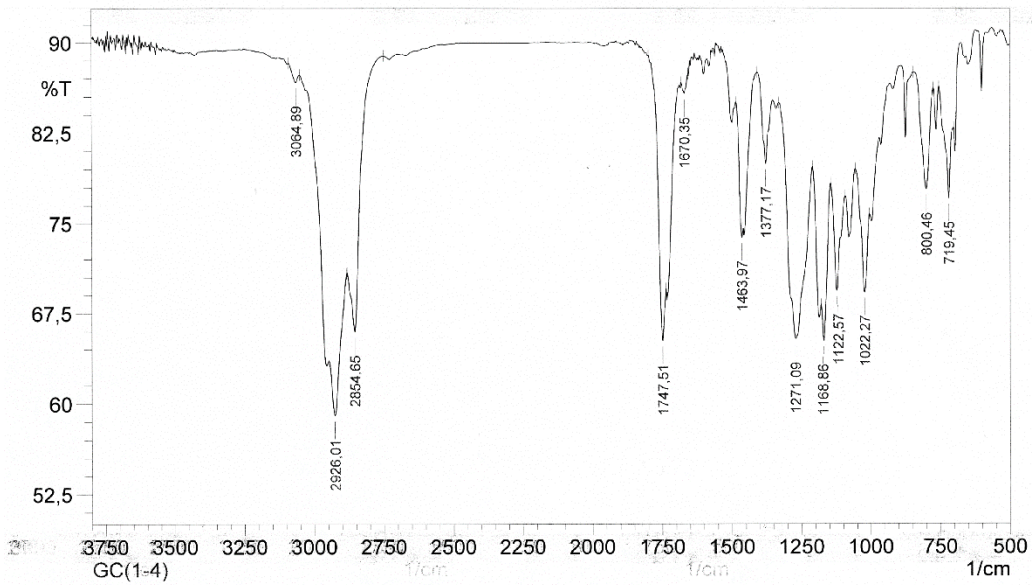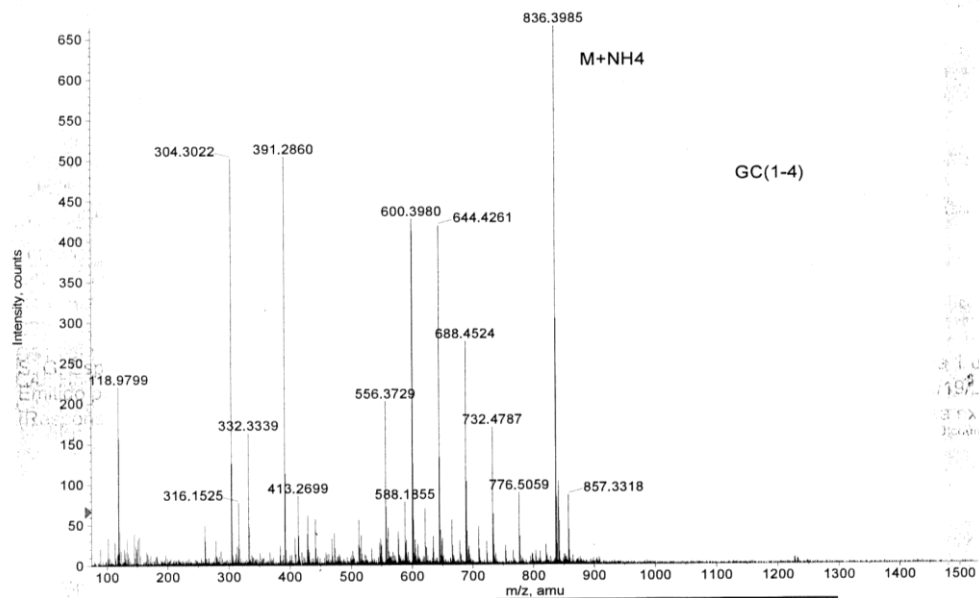

| Formula             | CalculatedMass | mDaError  | ppmError  | RDB  |
|---------------------|----------------|-----------|-----------|------|
| C49 H53 N3 O F6 Na  | 836.398504     | -0.004404 | -0.005265 | 21.5 |
| C46 H52 N5 O3 F6    | 836.396887     | 1.61304   | 1.928553  | 20.5 |
| C37 H57 N5 O8 F6 Na | 836.400355     | -1.85506  | -2.217913 | 8.5  |
| C51 H52 N3 O F6     | 836.40091      | -2.409664 | -2.880998 | 24.5 |
| C45 H56 N O7 F6     | 836.39555      | 2.950352  | 3.527445  | 15.5 |
| C44 H53 N5 O3 F6 Na | 836.394482     | 4.0183    | 4.804286  | 17.5 |
| C39 H56 N5 O8 F6    | 836.40276      | -4.26032  | -5.093645 | 11.5 |
| C43 H57 N O7 F6 Na  | 836.393144     | 5.355612  | 6.403178  | 12.5 |
| C42 H57 N3 O6 F6 Na | 836.404378     | -5.877764 | -7.027464 | 12.5 |
| C40 H56 N3 O9 F6    | 836.391527     | 6.973056  | 8.336997  | 11.5 |
| C44 H56 N3 O6 F6    | 836.406783     | -8.283024 | -9.903196 | 15.5 |

Figure S28. IR and HRMS of 31a/31b.

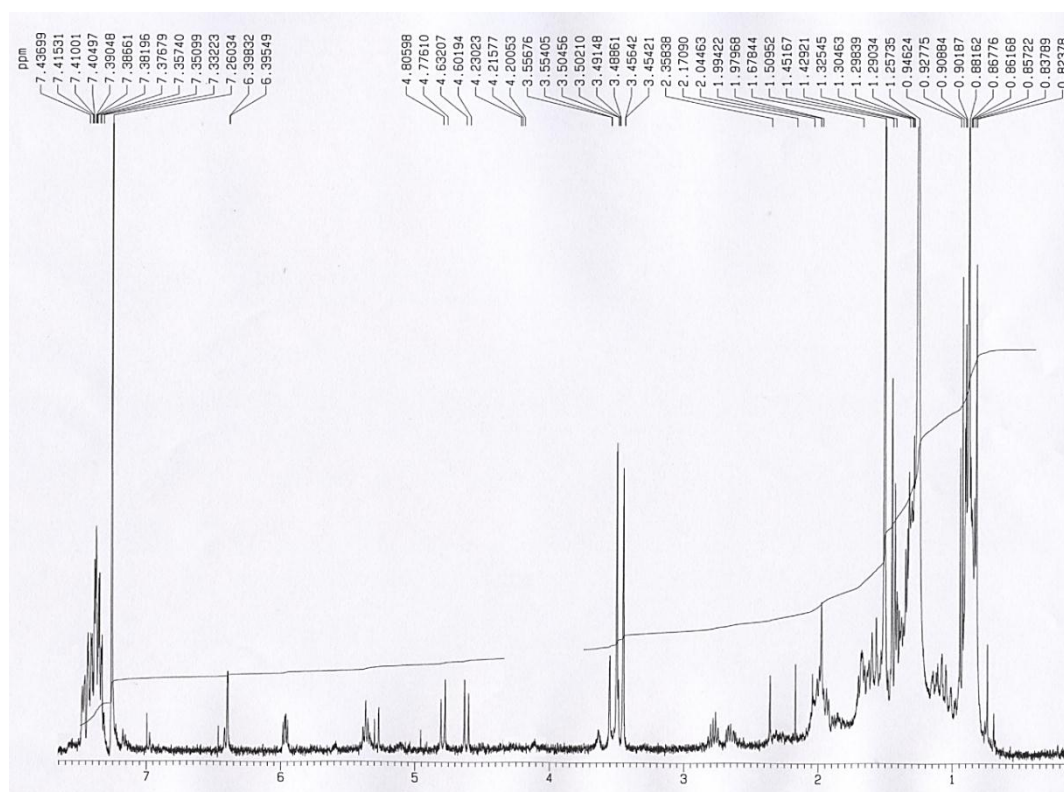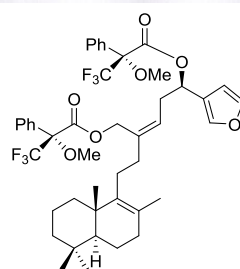

31a

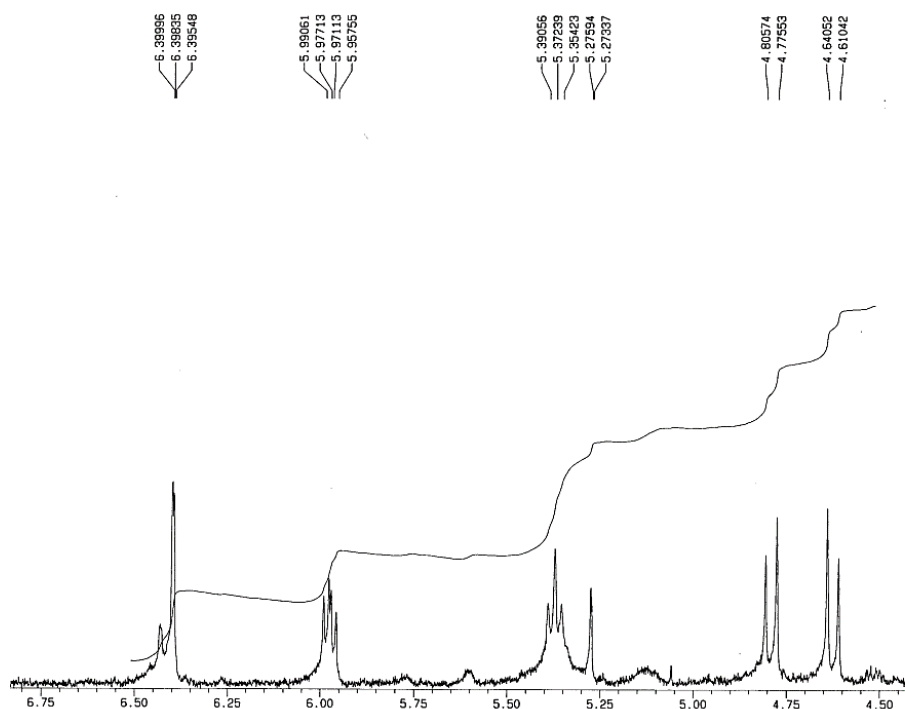**Figure S29.**  $^1\text{H-NMR}$   $\text{CDCl}_3$  and expansion of  $^1\text{H-NMR}$   $\text{CDCl}_3$ .



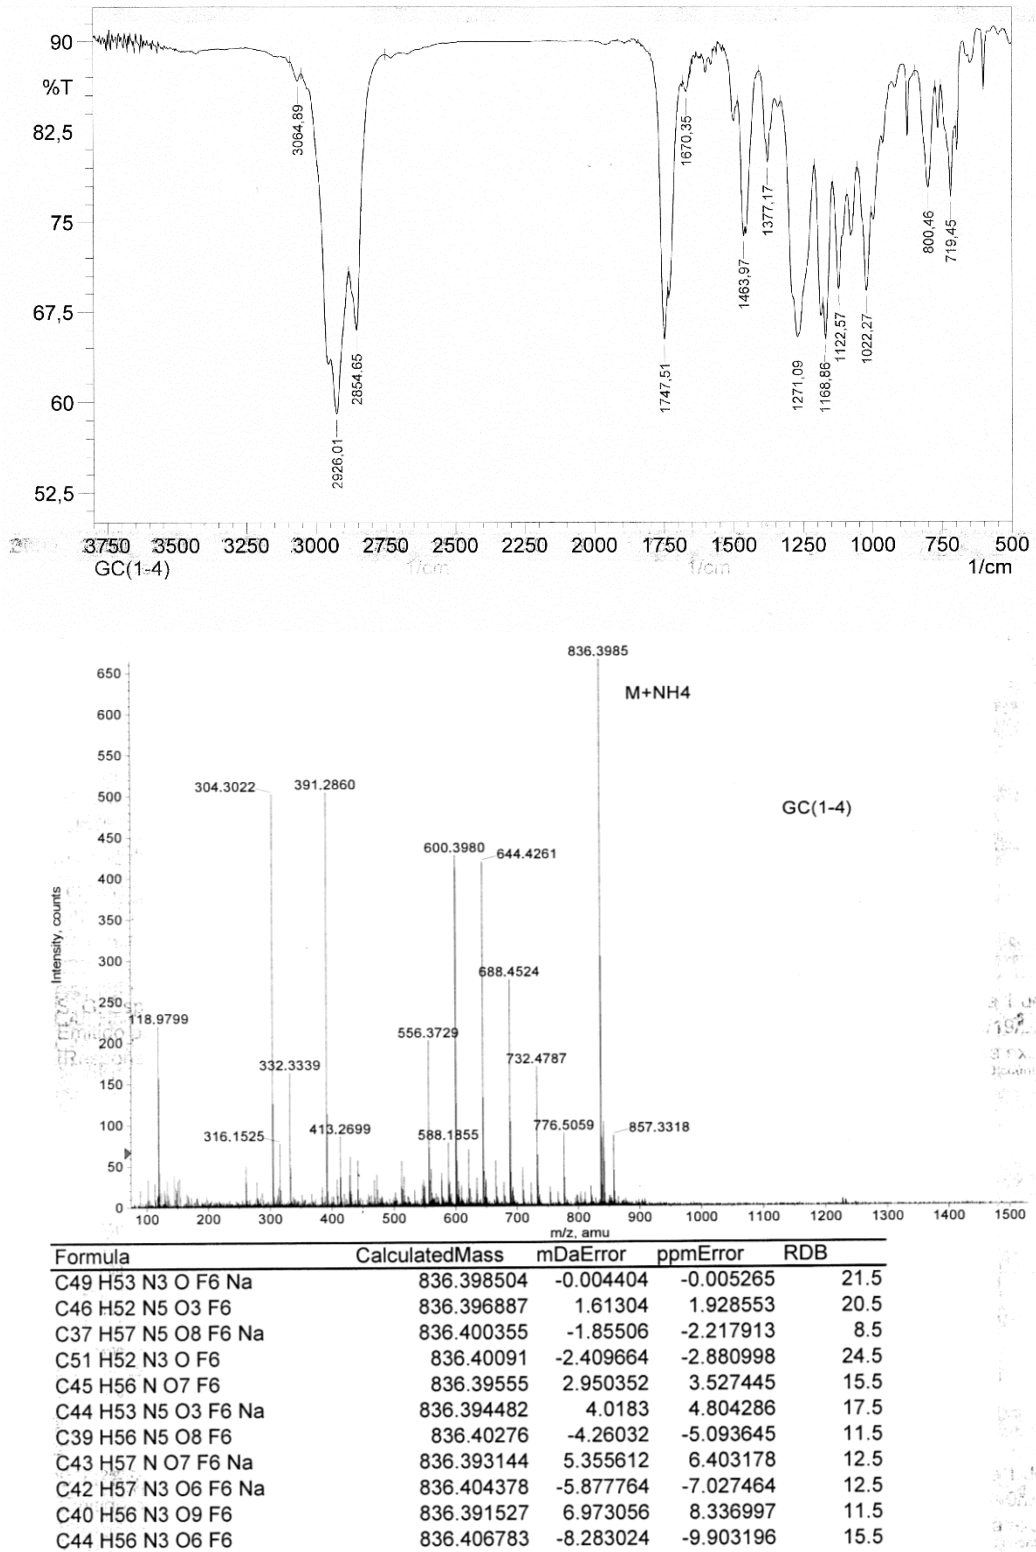

Figure S30. IR and HRMS of 31a.

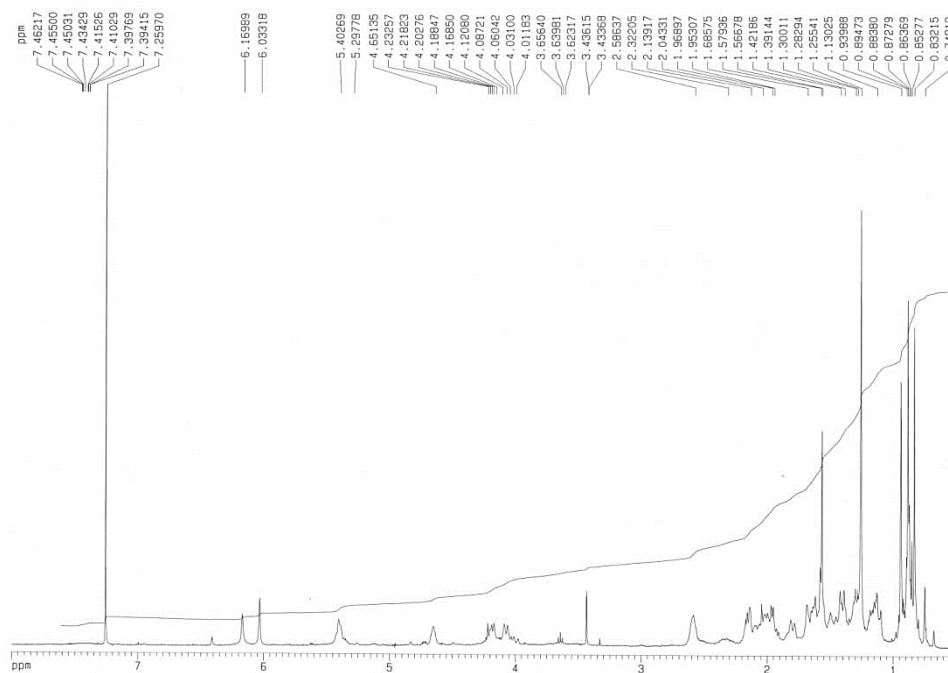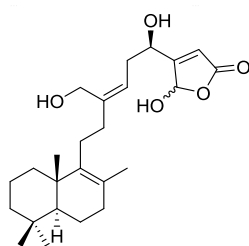

30

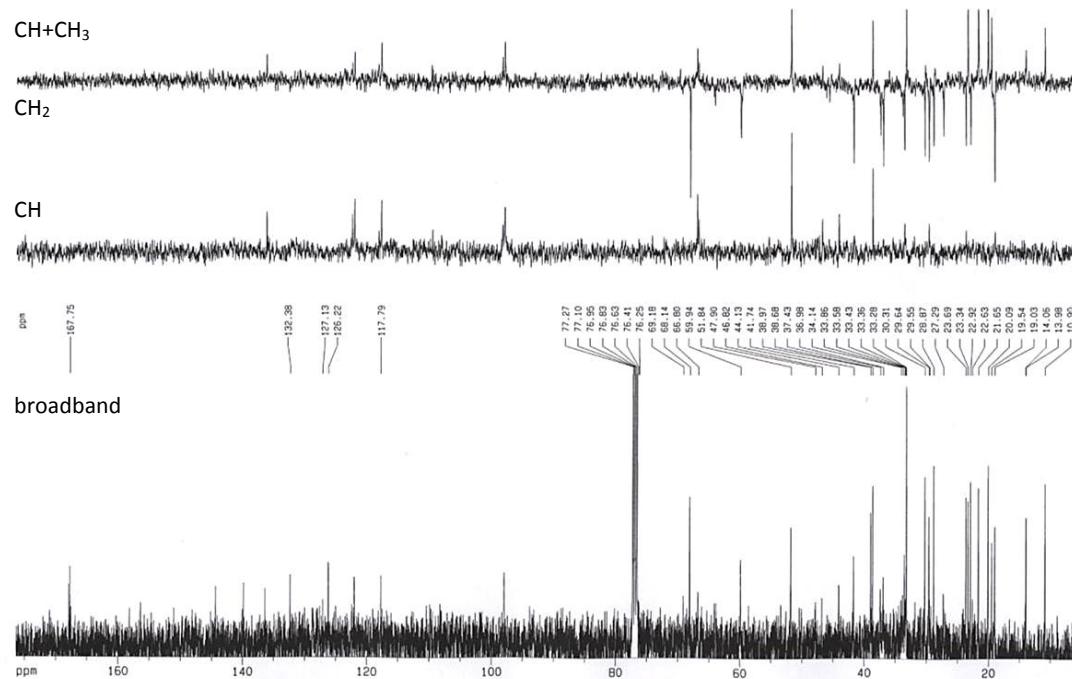Figure S31.  $^1\text{H-NMR}$   $\text{CDCl}_3$  and  $^{13}\text{C-NMR}$   $\text{CDCl}_3$ .

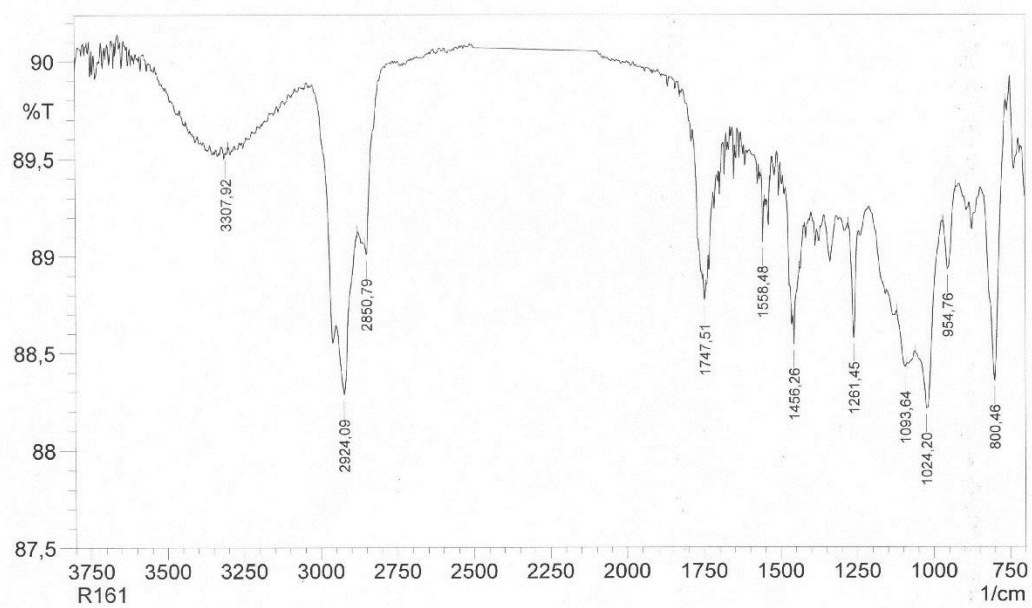

Figure S32. IR of 30.

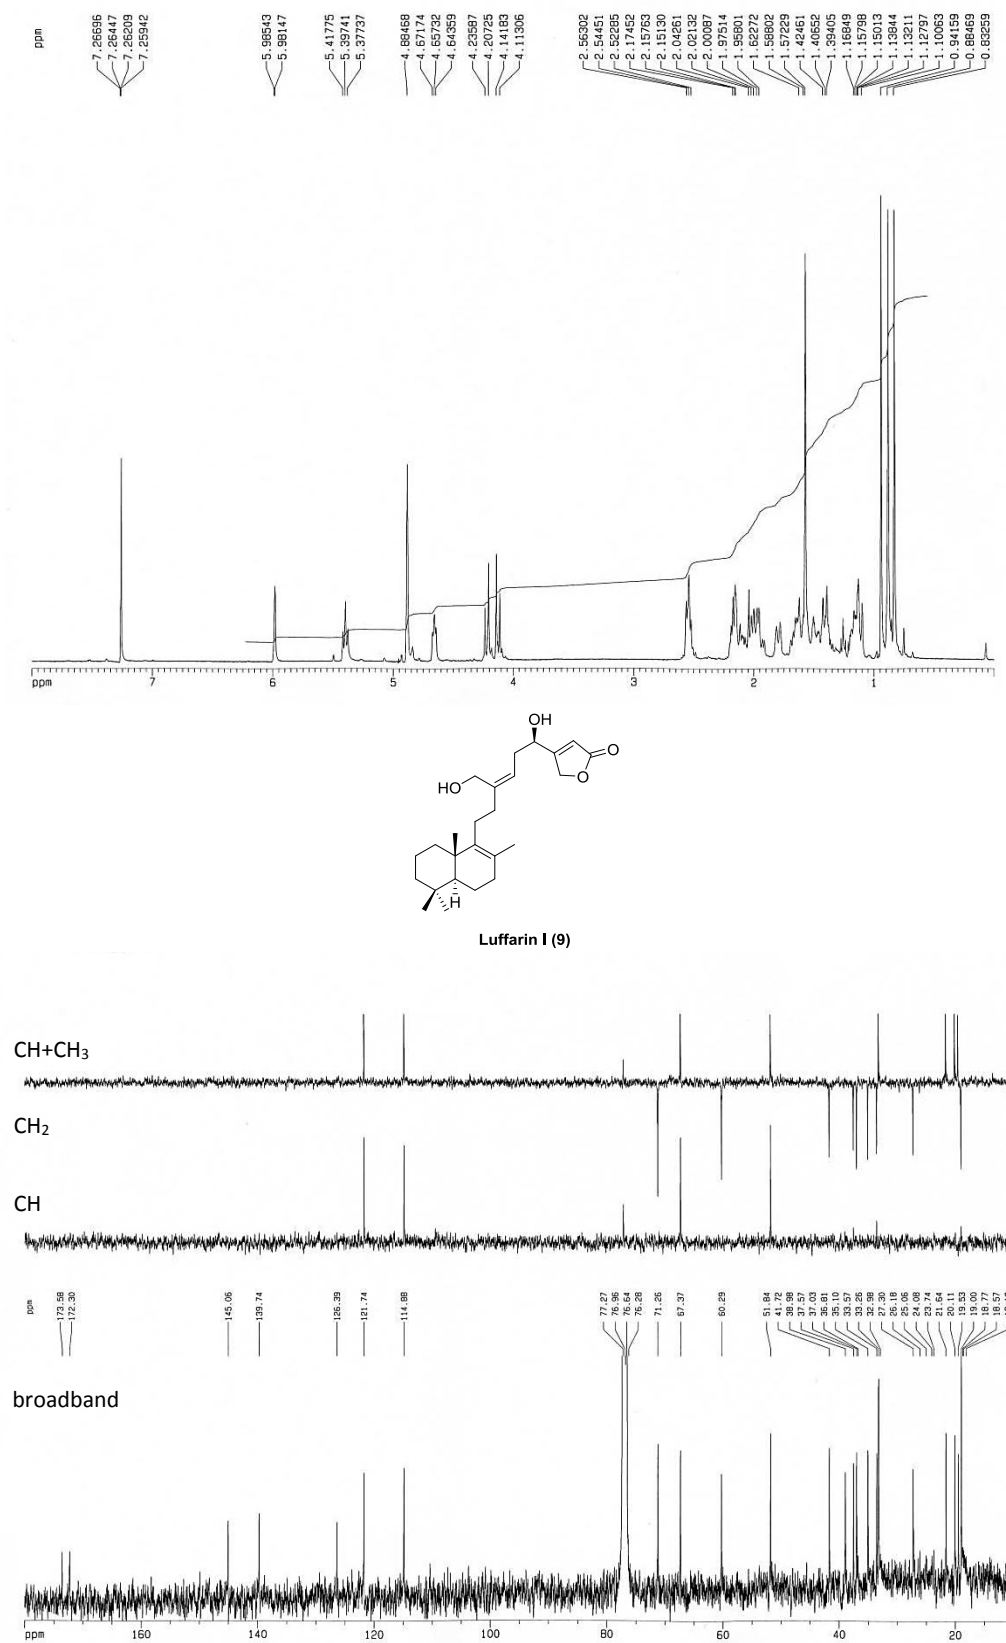Figure S33. <sup>1</sup>H-NMR CDCl<sub>3</sub> and <sup>13</sup>C-NMR CDCl<sub>3</sub>.

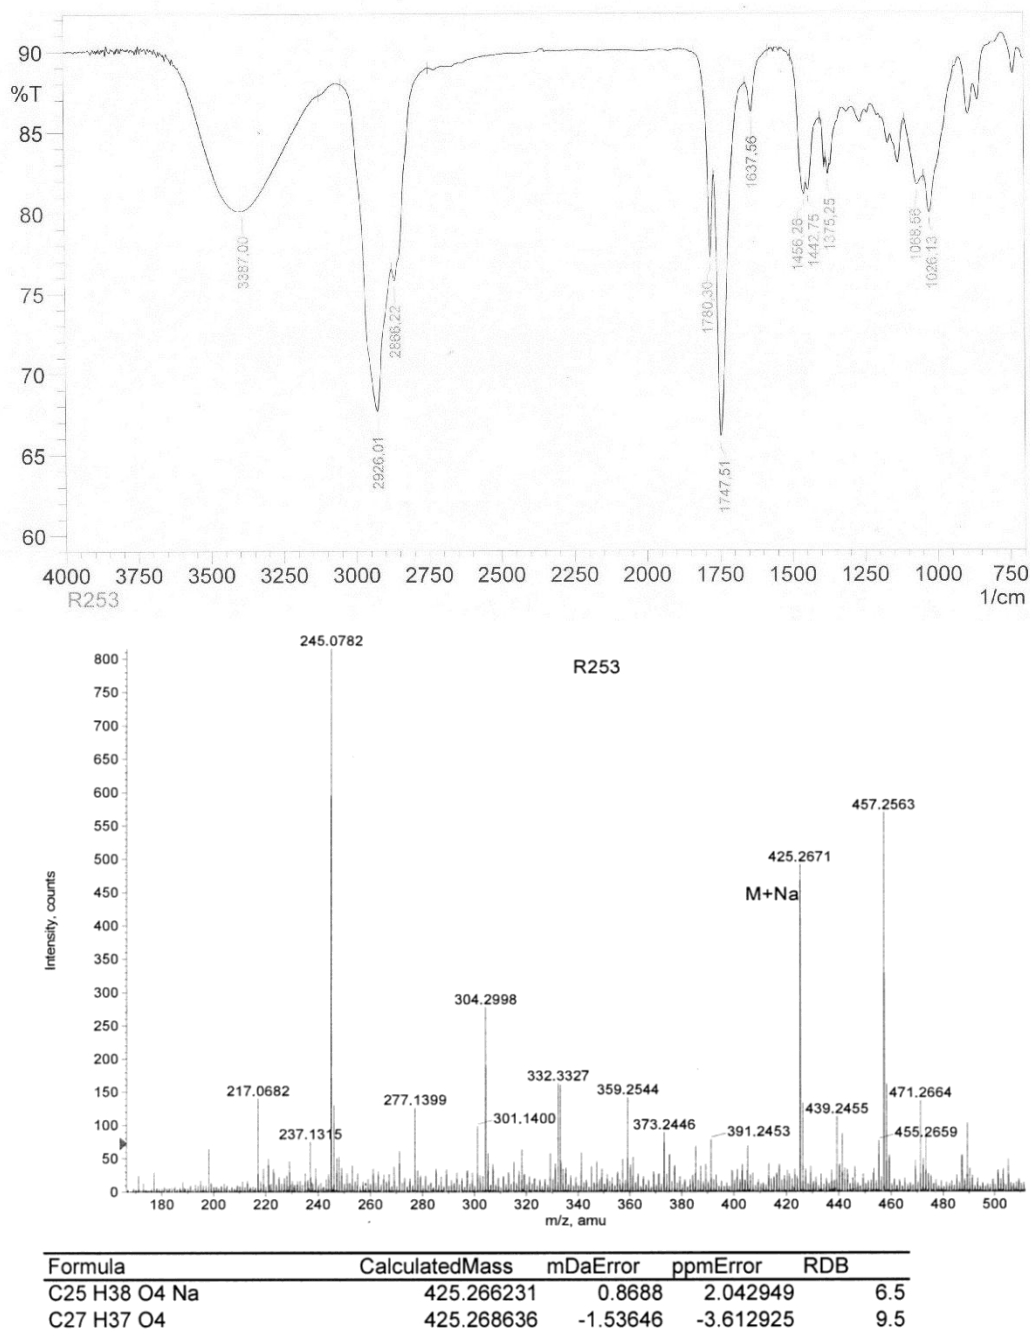

**Figure S34.** IR and HRMS of **9**.

## Reference

- Ohtani, I.I.; Hotta, K.; Ichikawa, Y.; Isobe, M. Application of modified Mosher's method to  $\alpha$ -aromatic secondary alcohols. Exception of the rule and conformational analyses. *Chem. Lett.* **1995**, 513–514, doi:10.1246/cl.1995.513.
